# Supplementary material for: Digitization of the electron shellviathe localized orbital locator formalism: trends in the size and electronegativity changes of atoms across the periodic table
Source: Royal Society of Chemistry journal article supplement (doi:10.1039/d2cp04203g), 2022-01-01
Supplement: d2cp04203g1.pdf [file d2cp04203g1.pdf]

## Electronic Supplementary Information (ESI)

### Digitization of Electron Shell via Localized Orbital Locator Formalism: Trends in the Size and Electronegativity changes of Atoms across Periodic Table

Andrei V. Afonin\*, Valentin A. Semenov and Alexander V. Vashchenko

A. E. Favorsky Irkutsk Institute of Chemistry, Siberian Branch of Russian Academy of Sciences,  
1 Favorsky St., 664033 Irkutsk, Russian Federation.

\* E-mail: [andvalaf@irioch.irk.ru](mailto:andvalaf@irioch.irk.ru) (Andrei V. Afonin)

| Contents                                                                                                                                                                                                                                                                                                                                                     | Page      |
|--------------------------------------------------------------------------------------------------------------------------------------------------------------------------------------------------------------------------------------------------------------------------------------------------------------------------------------------------------------|-----------|
| 1. Details of calculations                                                                                                                                                                                                                                                                                                                                   | S2        |
| 2. <b>Figure S1.</b> Location of the (3,-3) critical points in the LOL topology of some studied compounds.                                                                                                                                                                                                                                                   | S3        |
| 3. <b>Table S1.</b> Structure of studied compounds <b>1a; 2a; 3a,b; 4a,b; 5a-c; 6a-d; 7a-d; 8a-c; 9a,b; 10a; 11a-d; 12a,b; 13a-c; 14a-c; 15a-d; 16a-c; 17a,b; 18a; 19a-d; 20a-c; 21a-c; 22a-d; 23a-d; 24a-d; 25a,b; 26a,b</b>                                                                                                                                | S4        |
| 4. <b>Table S2.</b> The values of the calculated parameters for the (3,-3) critical point in the LOL space topology related to the electron shell of element hydrides and methyls <b>1a-26a</b>                                                                                                                                                              | S6, S6    |
| 5. <b>Table S3.</b> The values of the calculated parameters for the (3,-3) critical point in the LOL space topology related to the electron shell of element hydrides and methyls <b>1a; 2a; 3a,b; 4a,b; 5a-c; 6a-d; 7a-d; 8a-c; 9a,b; 10a; 11a-d; 12a,b; 13a-c; 14a-c; 15a-d; 16a-c; 17a,b; 18a; 19a-d; 20a-c; 21a-c; 22a-d; 23a-d; 24a-d; 25a,b; 26a,b</b> | S7 – S9   |
| 6. <b>Table S4.</b> Filled and empty ranges for the r(LOL-shell), $\rho$ (LOL-shell), V(LOL-shell), K(LOL-shell) and H(LOL-shell) parameters of the (3,-3) LOL-shell critical point for the elements of 2 <sup>nd</sup> period of periodic table.                                                                                                            | S10       |
| 7. <b>Table S5.</b> Filled and empty ranges for the r(LOL-shell), $\rho$ (LOL-shell), V(LOL-shell), K(LOL-shell) and H(LOL-shell) parameters of the (3,-3) LOL-shell critical point for the elements of 3 <sup>rd</sup> period of periodic table.                                                                                                            | S11       |
| 8. <b>Table S6.</b> Filled and empty ranges for the r(LOL-shell), $\rho$ (LOL-shell), V(LOL-shell), K(LOL-shell) and H(LOL-shell) parameters of the (3,-3) LOL-shell critical point for the elements of 4 <sup>th</sup> period of periodic table.                                                                                                            | S12, S13  |
| 9. <b>Table S7.</b> The value of electronegativity, atomic, covalent, van der Waals radii and energy of ionization for elements of 1 <sup>st</sup> , 2 <sup>nd</sup> , 3 <sup>rd</sup> and 4 <sup>th</sup> periods of periodic table.                                                                                                                        | S14       |
| 10. <b>Table S8.</b> The values of the calculated parameters for the (3,-3) LOL and ELF critical points related to the electron shells of element hydrides and methyls <b>3a-26a</b>                                                                                                                                                                         | S15, S16  |
| 11. Cartesian coordinates of studied compounds, optimized at the (u)B3LYP/AQZP//ATZP level in gas phase                                                                                                                                                                                                                                                      | S17 – S23 |

## 1. Details of calculations

Geometry optimization of all compounds and complexes was performed with GAUSSIAN 09 program package<sup>1</sup> at the B3LYP/AQZP//ATZP level. All calculated structures are minima on the potential energy surfaces as proved by the absence of imaginary frequencies. Open-shell electronic structures were calculated within the framework of unrestricted DFT (uB3LYP). Analysis of the electron density using the obtained wave functions were performed with the Multiwfn program<sup>2</sup> in order to locate the (3,-3) critical points of the Localized Orbital Locator (LOL) for elements hydrides and methyls **1a**; **2a**; **3a,b**; **4a,b**; **5a-c**; **6a-d**; **7a-d**; **8a-c**; **9a,b**; **10a**; **11a-d**; **12a,b**; **13a-c**; **14a-c**; **15a-d**; **16a-c**; **17a,b**; **18a**; **19a-d**; **20a-c**; **21a-c**; **22a-d**; **23a-d**; **24a-d**; **25a,b**; **26a,b**. The search for the critical points was carried out from nuclear positions and the batch of points within a sphere with the gradient-norm convergence criterion equal to  $1 \cdot 10^{-5}$  and the number of points in the sphere equal to 3000.

For the detailed consideration of the mathematical apparatus to calculate the localized orbital locator function see ref. 3.

## References

1. Gaussian 09, Revision C.01, M. J. Frisch, G. W. Trucks, H. B. Schlegel, G. E. Scuseria, M. A. Robb, J. R. Cheeseman, G. Scalmani, V. Barone, B. Mennucci, G. A. Petersson, H. Nakatsuji, M. Caricato, X. Li, H. P. Hratchian, A. F. Izmaylov, J. Bloino, G. Zheng, J. L. Sonnenberg, M. Hada, M. Ehara, K. Toyota, R. Fukuda, J. Hasegawa, M. Ishida, T. Nakajima, Y. Honda, O. Kitao, H. Nakai, T. Vreven, J. A. Montgomery, Jr., J. E. Peralta, F. Ogliaro, M. Bearpark, J. J. Heyd, E. Brothers, K. N. Kudin, V. N. Staroverov, T. Keith, R. Kobayashi, J. Normand, K. Raghavachari, A. Rendell, J. C. Burant, S. S. Iyengar, J. Tomasi, M. Cossi, N. Rega, J. M. Millam, M. Klene, J. E. Knox, J. B. Cross, V. Bakken, C. Adamo, J. Jaramillo, R. Gomperts, R. E. Stratmann, O. Yazyev, A. J. Austin, R. Cammi, C. Pomelli, J. W. Ochterski, R. L. Martin, K. Morokuma, V. G. Zakrzewski, G. A. Voth, P. Salvador, J. J. Dannenberg, S. Dapprich, A. D. Daniels, O. Farkas, J. B. Foresman, J. V. Ortiz, J. Cioslowski, and D. J. Fox, Gaussian, Inc., Wallingford CT, 2011. See <http://www.gaussian.com>.
2. T. Lu and F. Chen, *J. Comput. Chem.*, 2012, **33**, 580–592.
3. H. L. Schmider and A. D. Becke, *J. Mol. Struct. (THEOCHEM)*, 2000, **527**, 51–61.

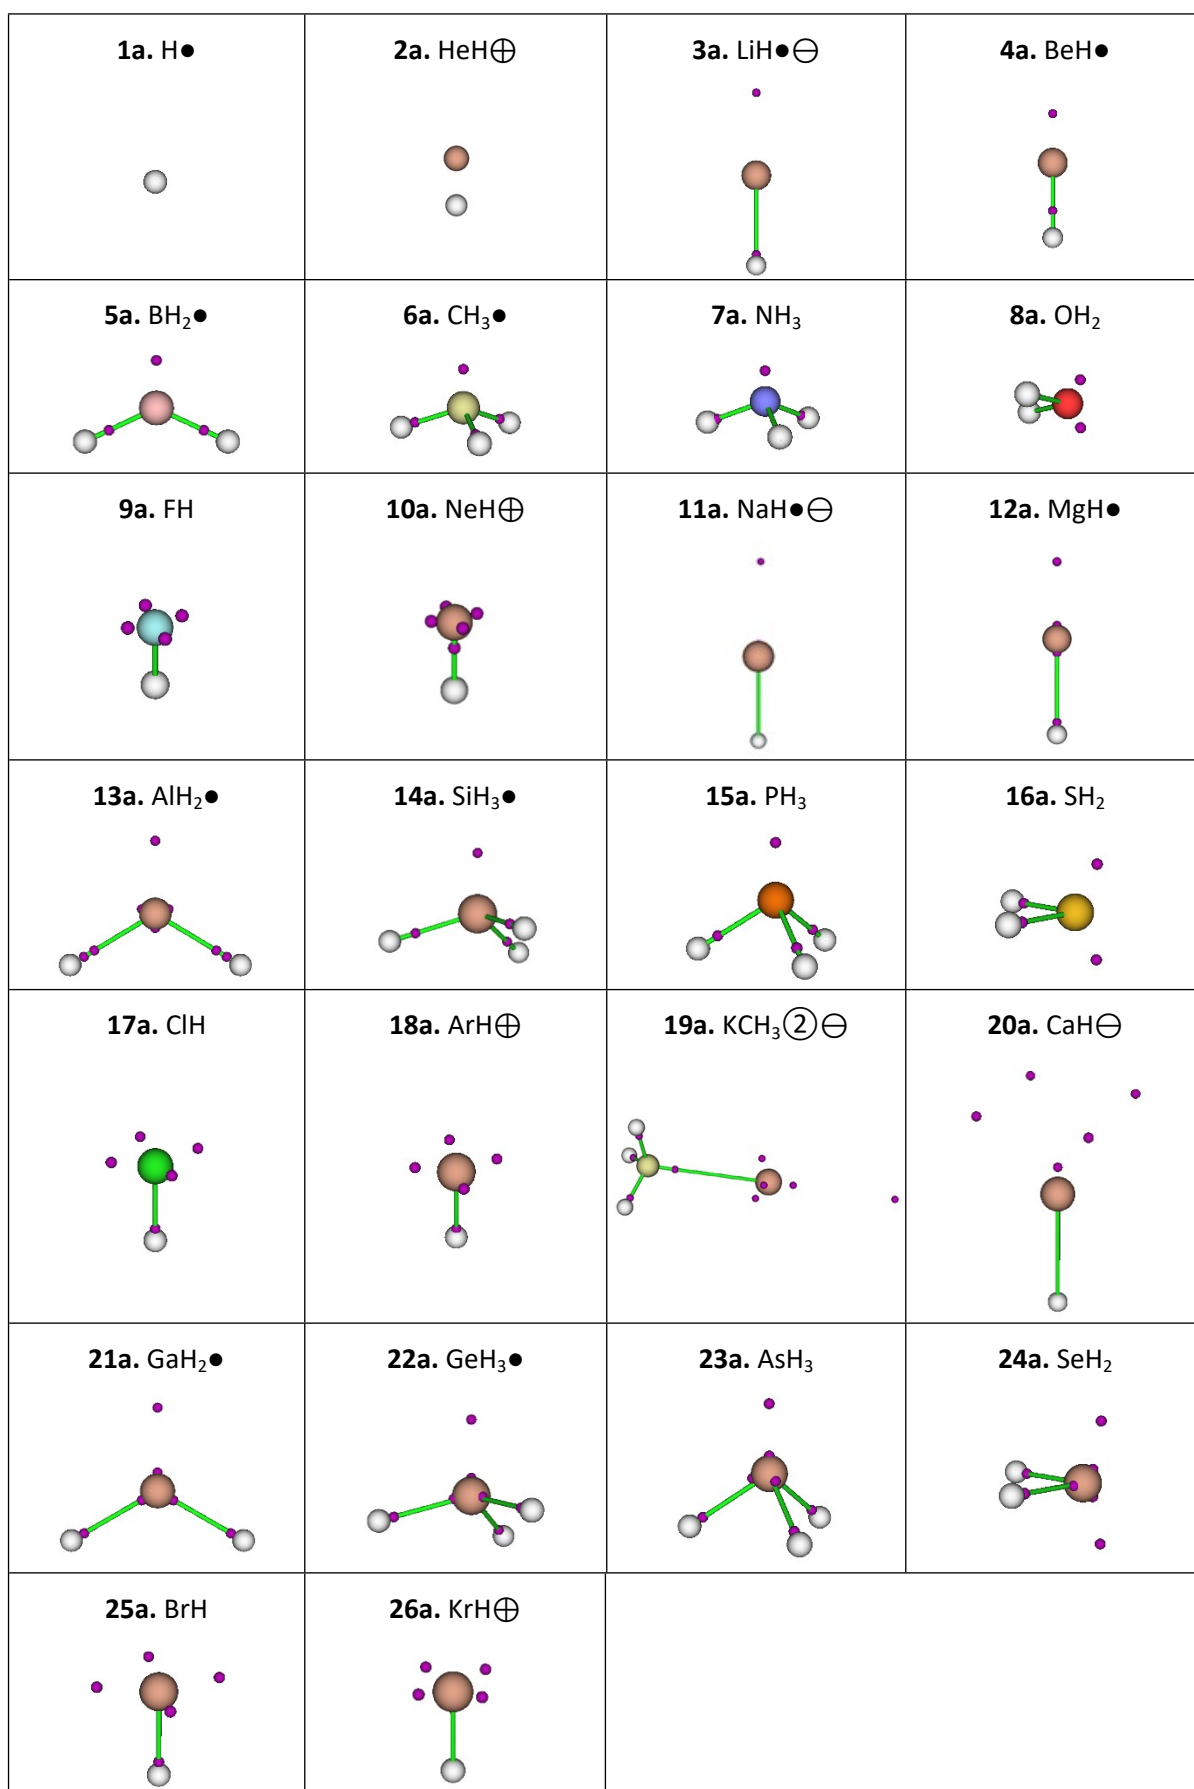

**2. Figure S1.** Location of the (3,-3) critical points in the LOL topology of some studied compounds. The (3,-3) LOL critical points are indicated by purple circles inside the positions of nuclei, covalent bonds and near the element atom. Critical points located near the atomic nucleus (less than 0.3 Å) are masked by the image of the element. Designations: ● – radical; ⊕ – cation; ⊖ – anion; ●⊖ – anion radical; ●⊕ – cation radical, (2)⊕ – dication, (2)⊖ – dianion.

**3. Table S1.** Structures of studied compounds **1a; 2a; 3a,b; 4a,b; 5a-c; 6a-d; 7a-d; 8a-c; 9a,b; 10a; 11a-d; 12a,b; 13a-c; 14a-c; 15a-d; 16a-c; 17a,b; 18a; 19a-d; 20a-c; 21a-c; 22a-d; 23a-d; 24a-d; 25a,b; 26a,b.** Designations: ● – radical; ⊕ – cation; ⊖ – anion; ●⊖ – anion radical; ●⊕ – cation radical, (2)⊕ – dication, (2)⊖ – dianion.

| No                           | Structure              | No                           | Structure              | No         | Structure            | No                           | Structure             |
|------------------------------|------------------------|------------------------------|------------------------|------------|----------------------|------------------------------|-----------------------|
| <b>1<sup>st</sup> period</b> |                        | <b>7a</b>                    | NH <sub>3</sub>        | <b>12a</b> | MgH●                 | <b>17a</b>                   | ClH                   |
| <b>1a</b>                    | H●                     | <b>7b</b>                    | NH <sub>3</sub> ●⊕     | <b>12b</b> | MgH⊖                 | <b>17b</b>                   | ClH <sub>2</sub> ⊕    |
| <b>2a</b>                    | HeH⊕                   | <b>7c</b>                    | NH <sub>2</sub> ⊖      | <b>13a</b> | AlH <sub>2</sub> ●   | <b>18a</b>                   | ArH⊕                  |
| <b>2<sup>nd</sup> period</b> |                        | <b>7d</b>                    | NH <sub>2</sub> ⊕      | <b>13b</b> | AlH <sub>2</sub> ⊖   | <b>4<sup>th</sup> period</b> |                       |
| <b>3a</b>                    | LiH●⊖                  | <b>8a</b>                    | OH <sub>2</sub>        | <b>13c</b> | AlH                  | <b>19a</b>                   | KCH <sub>3</sub> (2)⊖ |
| <b>3b</b>                    | LiCH <sub>3</sub> (2)⊖ | <b>8b</b>                    | OH⊕                    | <b>14a</b> | SiH <sub>3</sub> ●   | <b>19b</b>                   | KH●⊖                  |
| <b>4a</b>                    | BeH●                   | <b>8c</b>                    | OH <sub>2</sub> (2)⊕   | <b>14b</b> | SiH <sub>3</sub> ⊖   | <b>19c</b>                   | K- <i>i</i> -Pr(2)⊖   |
| <b>4b</b>                    | BeH⊖                   | <b>9a</b>                    | FH                     | <b>14c</b> | SiH <sub>2</sub>     | <b>19d</b>                   | KCH <sub>3</sub> ●⊖   |
| <b>5a</b>                    | BH <sub>2</sub> ●      | <b>9b</b>                    | FH <sub>2</sub> ⊕      | <b>15a</b> | PH <sub>3</sub>      | <b>20a</b>                   | CaH⊖                  |
| <b>5b</b>                    | BH <sub>2</sub> ⊖      | <b>10a</b>                   | NeH⊕                   | <b>15b</b> | PH <sub>3</sub> ●    | <b>20b</b>                   | CaH●                  |
| <b>5c</b>                    | BH                     | <b>3<sup>rd</sup> period</b> |                        | <b>15c</b> | PH <sub>2</sub> ⊖    | <b>20c</b>                   | CaCH <sub>3</sub> ⊖   |
| <b>6a</b>                    | CH <sub>3</sub> ●      | <b>11a</b>                   | NaH●⊖                  | <b>15d</b> | PH <sub>2</sub> ⊕    | <b>21a</b>                   | GaH <sub>2</sub> ●    |
| <b>6b</b>                    | CH <sub>3</sub> ⊖      | <b>11b</b>                   | NaCH <sub>3</sub> (2)⊖ | <b>16a</b> | SH <sub>2</sub>      | <b>21b</b>                   | GaH <sub>2</sub> ⊖    |
| <b>6c</b>                    | CH <sub>2</sub>        | <b>11c</b>                   | NaH(2)⊖                | <b>16b</b> | SH⊕                  | <b>21c</b>                   | GaH                   |
| <b>6d</b>                    | CH <sub>2</sub> (2)⊖   | <b>11d</b>                   | NaCH <sub>3</sub> ●⊖   | <b>16c</b> | SH <sub>2</sub> (2)⊕ | <b>22a</b>                   | GeH <sub>3</sub> ●    |
|                              |                        |                              |                        |            |                      | <b>23a</b>                   | AsH <sub>3</sub>      |
|                              |                        |                              |                        |            |                      | <b>23b</b>                   | AsH <sub>3</sub> ●    |
|                              |                        |                              |                        |            |                      | <b>23c</b>                   | AsH <sub>2</sub> ⊖    |
|                              |                        |                              |                        |            |                      | <b>23d</b>                   | AsH <sub>2</sub> ⊕    |
|                              |                        |                              |                        |            |                      | <b>24a</b>                   | SeH <sub>2</sub>      |
|                              |                        |                              |                        |            |                      | <b>24b</b>                   | SeH⊖                  |
|                              |                        |                              |                        |            |                      | <b>24c</b>                   | SeH⊕                  |
|                              |                        |                              |                        |            |                      | <b>24d</b>                   | SeH <sub>2</sub> (2)⊕ |
|                              |                        |                              |                        |            |                      | <b>25a</b>                   | BrH                   |
|                              |                        |                              |                        |            |                      | <b>25b</b>                   | BrH <sub>2</sub> ⊕    |
|                              |                        |                              |                        |            |                      | <b>26a</b>                   | KrH⊕                  |
|                              |                        |                              |                        |            |                      | <b>26b</b>                   | KrCH <sub>3</sub> ⊕   |

**4. Table S2.** The values of the calculated parameters for the (3,-3) critical point in the LOL space topology related to the electron shell of element hydrides and methyls **1a–26a**: the distance between the (3,-3) LOL critical point and the element nucleus ( $r(\text{LOL-shell})$ ) in pm, the value of LOL at the (3,-3) LOL-shell critical point, the value of  $\rho$  electron density at the (3,-3) LOL-shell critical point ( $\rho(\text{LOL-shell})$ , in a.u., 1 a.u. = 6.7483 eÅ<sup>-3</sup>), the value of potential V electron energy density at the (3,-3) LOL-shell critical point ( $V(\text{LOL-shell})$ , in a.u., 1 a.u. = 1 Hartree), the value of kinetic K electron energy density at the (3,-3) LOL-shell critical point ( $K(\text{LOL-shell})$ , in a.u., 1 a.u. = 1 Hartree) and the value of total H electron energy density at the (3,-3) LOL-shell critical point ( $H(\text{LOL-shell})$ , in a.u., 1 a.u. = 1 Hartree).

| No                                       | structure                                      | $r(\text{LOL-shell})$ | LOL-shell | $\rho(\text{LOL-shell})$ | $V(\text{LOL-shell})$ | $K(\text{LOL-shell})$ | $H(\text{LOL-shell})$ |
|------------------------------------------|------------------------------------------------|-----------------------|-----------|--------------------------|-----------------------|-----------------------|-----------------------|
| <b>1<sup>st</sup> period</b>             |                                                |                       |           |                          |                       |                       |                       |
| 1a                                       | H                                              | 8.6                   | 0.77361   | 0.235706                 | -1.379736             | 0.119961              | -1.259776             |
| 2a                                       | HeH <sup>⊕</sup>                               | 4.2                   | 0.77110   | 2.637644                 | -61.044998            | 4.291500              | -56.753499            |
| <b>2<sup>nd</sup> period</b>             |                                                |                       |           |                          |                       |                       |                       |
| 3a                                       | LiH <sup>⊙</sup>                               | 159.7                 | 0.83583   | 0.003370                 | -0.000588             | 0.000068              | -0.000521             |
| 4a                                       | BeH <sup>●</sup>                               | 90.9                  | 0.79328   | 0.031525                 | -0.019778             | 0.003702              | -0.016076             |
| 5a                                       | BH <sub>2</sub> <sup>●</sup>                   | 71.4                  | 0.70851   | 0.079912                 | -0.095575             | 0.025826              | -0.069750             |
| 6a                                       | CH <sub>3</sub> <sup>●</sup>                   | 59.9                  | 0.58975   | 0.143062                 | -0.283892             | 0.111020              | -0.172871             |
| 7a                                       | NH <sub>3</sub>                                | 47.1                  | 0.62301   | 0.433379                 | -1.246359             | 0.431206              | -0.815153             |
| 8a                                       | OH <sub>2</sub>                                | 40.5                  | 0.59972   | 0.737219                 | -3.080308             | 1.152935              | -1.927373             |
| 9a                                       | FH                                             | 35.8                  | 0.57947   | 1.153258                 | -6.593179             | 2.642722              | -3.950457             |
| 10a                                      | NeH <sup>⊕</sup>                               | 31.4                  | 0.57783   | 1.825768                 | -13.979907            | 5.721411              | -8.258497             |
| <b>3<sup>rd</sup> period<sup>a</sup></b> |                                                |                       |           |                          |                       |                       |                       |
| 11a                                      | NaH <sup>⊙</sup>                               | 216.9                 | 0.74142   | 0.002036                 | -0.000225             | 0.000050              | -0.000175             |
|                                          |                                                | 28.2                  | 0.56889   | 2.648198                 | -26.020247            | 11.029371             | -14.990877            |
| 12a                                      | MgH <sup>●</sup>                               | 141.2                 | 0.65696   | 0.010438                 | -0.003528             | 0.001103              | -0.002426             |
|                                          |                                                | 25.0                  | 0.57309   | 3.956147                 | -50.431881            | 21.168405             | -29.263476            |
| 13a                                      | AlH <sub>2</sub> <sup>●</sup>                  | 117.2                 | 0.71808   | 0.026050                 | -0.014256             | 0.003752              | -0.010504             |
|                                          |                                                | 22.6                  | 0.57484   | 5.568760                 | -87.721242            | 37.154764             | -50.566478            |
| 14a                                      | SiH <sub>3</sub> <sup>●</sup>                  | 101.4                 | 0.69177   | 0.046218                 | -0.037801             | 0.010872              | -0.026929             |
|                                          |                                                | 20.5                  | 0.57459   | 7.572301                 | -146.578010           | 62.073158             | -84.504852            |
| 15a                                      | PH <sub>3</sub>                                | 85.3                  | 0.69053   | 0.105765                 | -0.108668             | 0.030438              | -0.078230             |
|                                          |                                                | 18.6                  | 0.57700   | 10.361623                | -246.822943           | 103.658739            | -143.164204           |
| 16a                                      | SH <sub>2</sub>                                | 76.5                  | 0.65976   | 0.162196                 | -0.231199             | 0.071427              | -0.159772             |
|                                          |                                                | 17.2                  | 0.57642   | 13.412808                | -379.575770           | 159.757841            | -219.817929           |
| 17a                                      | ClH                                            | 69.2                  | 0.62076   | 0.231341                 | -0.441498             | 0.152927              | -0.288571             |
|                                          |                                                | 15.9                  | 0.57510   | 17.047062                | -567.917354           | 239.534994            | -328.382360           |
| 18a                                      | ArH <sup>⊕</sup>                               | 62.2                  | 0.61675   | 0.340758                 | -0.854533             | 0.296605              | -0.557928             |
|                                          |                                                | 14.9                  | 0.57473   | 21.293736                | -818.364883           | 347.551464            | -470.813419           |
| <b>4<sup>th</sup> period<sup>b</sup></b> |                                                |                       |           |                          |                       |                       |                       |
| 19a                                      | KCH <sub>3</sub> ( <sup>⊙</sup> ) <sup>⊖</sup> | 268.2                 | 0.30933   | 0.000665                 | -0.000075             | 0.000033              | -0.000043             |
|                                          |                                                | 57.1                  | 0.59914   | 0.468889                 | -1.511413             | 0.543639              | -0.967774             |
|                                          |                                                | 14.0                  | 0.57248   | 25.960089                | -1137.546925          | 488.019500            | -649.527425           |
| 20a                                      | CaH <sup>⊖</sup>                               | 218.2                 | 0.60399   | 0.003596                 | -0.000372             | 0.000159              | -0.000213             |
|                                          |                                                | 51.6                  | 0.60558   | 0.669117                 | -2.728220             | 0.957251              | -1.770969             |
|                                          |                                                | 13.1                  | 0.57183   | 31.966382                | -1613.925010          | 692.210787            | -921.714223           |
| 21a                                      | GaH <sub>2</sub> <sup>●</sup>                  | 133.5                 | 0.48415   | 0.020488                 | -0.010958             | 0.006398              | -0.004560             |
|                                          |                                                | 29.6                  | 0.56866   | 6.773438                 | -119.595316           | 52.812283             | -66.783033            |
|                                          |                                                | 7.8                   | 0.56469   | 157.974324               | -23736.946580         | 10218.022490          | -13518.749780         |
| 22a                                      | GeH <sub>3</sub> <sup>●</sup>                  | 123.0                 | 0.53633   | 0.029948                 | -0.019234             | 0.009926              | -0.009308             |
|                                          |                                                | 28.2                  | 0.57051   | 8.029421                 | -158.945125           | 69.595124             | -89.350001            |
|                                          |                                                | 7.6                   | 0.56348   | 175.946670               | -28311.995730         | 12288.304150          | -16023.691580         |
| 23a                                      | AsH <sub>3</sub>                               | 105.4                 | 0.54625   | 0.067020                 | -0.052902             | 0.026374              | -0.026528             |
|                                          |                                                | 26.8                  | 0.57358   | 9.591482                 | -212.901362           | 92.423042             | -120.478320           |
|                                          |                                                | 7.3                   | 0.56281   | 196.953579               | -34204.711870         | 14870.374390          | -19334.337480         |
| 24a                                      | SeH <sub>2</sub>                               | 97.3                  | 0.57123   | 0.097376                 | -0.096929             | 0.044418              | -0.052511             |
|                                          |                                                | 25.7                  | 0.57377   | 11.151628                | -273.511375           | 118.725351            | -154.786024           |
|                                          |                                                | 7.0                   | 0.56244   | 219.588104               | -41125.525210         | 17852.743400          | -23272.781810         |
| 25a                                      | BrH                                            | 89.9                  | 0.55028   | 0.129446                 | -0.165702             | 0.077727              | -0.087975             |
|                                          |                                                | 24.6                  | 0.57368   | 12.871053                | -347.221259           | 150.831234            | -196.390024           |
|                                          |                                                | 6.8                   | 0.56094   | 243.495600               | -48924.537010         | 21338.330580          | -27586.206430         |

|            |                  |      |         |            |               |              |               |
|------------|------------------|------|---------|------------|---------------|--------------|---------------|
| <b>26a</b> | KrH <sup>⊕</sup> | 82.0 | 0.53145 | 0.184994   | -0.317978     | 0.152038     | -0.165939     |
|            |                  | 23.6 | 0.57438 | 14.910916  | -444.594109   | 192.191470   | -252.402639   |
|            |                  | 6.6  | 0.56166 | 270.126191 | -58114.155080 | 25293.494340 | -32820.660740 |

<sup>a</sup>The upper values refer to the outer electron shell, the lower values refer to the inner electron shell. <sup>b</sup>The upper values refer to the outer electron shell, the middle values refer to the first inner electron shell, the lower values refer to the second (closest to the atomic nucleus) inner electron shell.

**5. Table S3.** The values of the calculated parameters for the (3,-3) critical point in the LOL space topology related to the electron shell of element hydrides and methyls **1a; 2a; 3a,b; 4a,b; 5a-c; 6a-d; 7a-d; 8a-c; 9a,b; 10a; 11a-d; 12a,b; 13a-c; 14a-c; 15a-d; 16a-c; 17a,b; 18a; 19a-d; 20a-c; 21a-c; 22a-d; 23a-d; 24a-d; 25a,b; 26a,b**: the distance between the (3,-3) LOL critical point and the element nucleus ( $r(\text{LOL-shell})$ ) in pm, the value of LOL at the (3,-3) LOL-shell critical point, the value of  $\rho$  electron density at the (3,-3) LOL-shell critical point ( $\rho(\text{LOL-shell})$ , in a.u., 1 a.u. = 6.7483 eÅ<sup>-3</sup>), the value of potential V electron energy density at the (3,-3) LOL-shell critical point ( $V(\text{LOL-shell})$ , in a.u., 1 a.u. = 1 Hartree), the value of kinetic K electron energy density at the (3,-3) LOL-shell critical point ( $K(\text{LOL-shell})$ , in a.u., 1 a.u. = 1 Hartree) and the value of total H electron energy density at the (3,-3) LOL-shell critical point ( $H(\text{LOL-shell})$ , in a.u., 1 a.u. = 1 Hartree).

| No                                       | structure                                       | $r(\text{LOL-shell})$ | LOL-shell | $\rho(\text{LOL-shell})$ | $V(\text{LOL-shell})$ | $K(\text{LOL-shell})$ | $H(\text{LOL-shell})$ |
|------------------------------------------|-------------------------------------------------|-----------------------|-----------|--------------------------|-----------------------|-----------------------|-----------------------|
| <b>1<sup>st</sup> period</b>             |                                                 |                       |           |                          |                       |                       |                       |
| <b>1a</b>                                | H                                               | 8.6                   | 0.77361   | 0.235706                 | -1.379736             | 0.119961              | -1.259776             |
| <b>2a</b>                                | HeH <sup>⊕</sup>                                | 4.2                   | 0.77110   | 2.637644                 | -61.044998            | 4.291500              | -56.753499            |
| <b>2<sup>nd</sup> period</b>             |                                                 |                       |           |                          |                       |                       |                       |
| <b>3a</b>                                | LiH <sup>•⊖</sup>                               | 159.7                 | 0.83583   | 0.003370                 | -0.000588             | 0.000068              | -0.000521             |
| <b>3b</b>                                | LiCH <sub>3</sub> ( <sup>⊖</sup> ) <sup>⊖</sup> | 158.3                 | 0.56442   | 0.002053                 | -0.000423             | 0.000074              | -0.000350             |
| <b>4a</b>                                | BeH <sup>•</sup>                                | 90.9                  | 0.79328   | 0.031525                 | -0.019778             | 0.003702              | -0.016076             |
| <b>4b</b>                                | BeH <sup>⊖</sup>                                | 92.9                  | 0.73905   | 0.031668                 | -0.015534             | 0.003214              | -0.012320             |
| <b>5a</b>                                | BH <sub>2</sub> <sup>•</sup>                    | 71.4                  | 0.70851   | 0.079912                 | -0.095575             | 0.025826              | -0.069750             |
| <b>5b</b>                                | BH <sub>2</sub> <sup>⊖</sup>                    | 71.1                  | 0.68453   | 0.091047                 | -0.094083             | 0.024383              | -0.069701             |
| <b>5c</b>                                | BH                                              | 65.4                  | 0.75401   | 0.125089                 | -0.141752             | 0.029308              | -0.112444             |
| <b>6a</b>                                | CH <sub>3</sub> <sup>•</sup>                    | 59.9                  | 0.58975   | 0.143062                 | -0.283892             | 0.111020              | -0.172871             |
| <b>6b</b>                                | CH <sub>3</sub> <sup>⊖</sup>                    | 59.4                  | 0.58820   | 0.175716                 | -0.306553             | 0.110810              | -0.195743             |
| <b>6c</b>                                | CH <sub>2</sub>                                 | 54.0                  | 0.70109   | 0.263786                 | -0.501404             | 0.132820              | -0.368584             |
| <b>6d</b>                                | CH <sub>2</sub> ( <sup>⊖</sup> ) <sup>⊖</sup>   | 60.7                  | 0.60409   | 0.174082                 | -0.279714             | 0.102132              | -0.177583             |
| <b>7a</b>                                | NH <sub>3</sub>                                 | 47.1                  | 0.62301   | 0.433379                 | -1.246359             | 0.431206              | -0.815153             |
| <b>7b</b>                                | NH <sub>3</sub> <sup>•⊕</sup>                   | 47.1                  | 0.62301   | 0.433379                 | -1.246359             | 0.431206              | -0.815152             |
| <b>7c</b>                                | NH <sub>2</sub> <sup>⊖</sup>                    | 48.3                  | 0.59048   | 0.378762                 | -1.065874             | 0.394843              | -0.671031             |
| <b>7d</b>                                | NH <sub>2</sub> <sup>⊕</sup>                    | 44.0                  | 0.69470   | 0.555357                 | -1.698246             | 0.473459              | -1.224787             |
| <b>8a</b>                                | OH <sub>2</sub>                                 | 40.5                  | 0.59972   | 0.737219                 | -3.080308             | 1.152935              | -1.927373             |
| <b>8b</b>                                | OH <sup>⊕</sup>                                 | 38.0                  | 0.68080   | 0.964238                 | -4.222897             | 1.266951              | -2.955945             |
| <b>8c</b>                                | OH <sub>2</sub> ( <sup>⊕</sup> ) <sup>⊕</sup>   | 37.4                  | 0.68452   | 0.992681                 | -4.417230             | 1.307202              | -3.110028             |
| <b>9a</b>                                | FH                                              | 35.8                  | 0.57947   | 1.153258                 | -6.593179             | 2.642722              | -3.950457             |
| <b>9b</b>                                | FH <sub>2</sub> <sup>⊕</sup>                    | 33.1                  | 0.66476   | 1.548121                 | -9.328061             | 2.999893              | -6.328168             |
| <b>10a</b>                               | NeH <sup>⊕</sup>                                | 31.4                  | 0.57783   | 1.825768                 | -13.979907            | 5.721411              | -8.258497             |
| <b>3<sup>rd</sup> period<sup>a</sup></b> |                                                 |                       |           |                          |                       |                       |                       |
| <b>11a</b>                               | NaH <sup>•⊖</sup>                               | 216.9                 | 0.74142   | 0.002036                 | -0.000225             | 0.000050              | -0.000175             |
|                                          |                                                 | 28.2                  | 0.56889   | 2.648198                 | -26.020247            | 11.029371             | -14.990877            |
| <b>11b</b>                               | NaCH <sub>3</sub> ( <sup>⊖</sup> ) <sup>⊖</sup> | 255.7                 | 0.58340   | 0.000951                 | -0.000088             | 0.000019              | -0.000069             |
|                                          |                                                 | 28.2                  | 0.56819   | 2.636347                 | -25.854581            | 10.978544             | -14.876036            |
| <b>11c</b>                               | NaH( <sup>⊖</sup> ) <sup>⊖</sup>                | 239.2                 | 0.61671   | 0.001147                 | -0.000112             | 0.000022              | -0.000090             |
|                                          |                                                 | 28.2                  | 0.56844   | 2.639395                 | -25.892888            | 10.988480             | -14.904408            |
| <b>11d</b>                               | NaCH <sub>3</sub> <sup>•⊖</sup>                 | 218.2                 | 0.72088   | 0.001901                 | -0.000199             | 0.000490              | -0.000149             |
|                                          |                                                 | 28.2                  | 0.56776   | 2.655960                 | -26.258947            | 11.134436             | -15.124512            |
| <b>12a</b>                               | MgH <sup>•</sup>                                | 141.2                 | 0.65696   | 0.010438                 | -0.003528             | 0.001103              | -0.002426             |
|                                          |                                                 | 25.0                  | 0.57309   | 3.956147                 | -50.431881            | 21.168405             | -29.263476            |
| <b>12b</b>                               | MgH <sup>⊖</sup>                                | 144.5                 | 0.63660   | 0.011007                 | -0.002838             | 0.000893              | -0.001945             |
|                                          |                                                 | 25.0                  | 0.57411   | 3.982646                 | -50.909024            | 21.313665             | -29.595359            |
| <b>13a</b>                               | AlH <sub>2</sub> <sup>•</sup>                   | 117.2                 | 0.71808   | 0.026050                 | -0.014256             | 0.003752              | -0.010504             |
|                                          |                                                 | 22.6                  | 0.57484   | 5.568760                 | -87.721242            | 37.154764             | -50.566478            |
| <b>13b</b>                               | AlH <sub>2</sub> <sup>⊖</sup>                   | 118.1                 | 0.69213   | 0.028794                 | -0.012291             | 0.003455              | -0.008836             |
|                                          |                                                 | 22.5                  | 0.57535   | 5.606019                 | -88.668740            | 37.491259             | -51.177481            |
| <b>13c</b>                               | AlH                                             | 113.6                 | 0.64574   | 0.029378                 | -0.013549             | 0.004406              | -0.009143             |
|                                          |                                                 | 22.5                  | 0.57803   | 5.675715                 | -90.105529            | 37.853383             | -52.252146            |
| <b>14a</b>                               | SiH <sub>3</sub> <sup>•</sup>                   | 101.4                 | 0.69177   | 0.046218                 | -0.037801             | 0.010872              | -0.026929             |
|                                          |                                                 | 20.5                  | 0.57459   | 7.572301                 | -146.578010           | 62.073158             | -84.504852            |
| <b>14b</b>                               | SiH <sub>3</sub> <sup>⊖</sup>                   | 100.1                 | 0.69599   | 0.057434                 | -0.039153             | 0.010722              | -0.028430             |
|                                          |                                                 | 20.4                  | 0.57560   | 7.693785                 | -150.465611           | 63.477324             | -86.988287            |
| <b>14c</b>                               | SiH <sub>2</sub>                                | 96.9                  | 0.69155   | 0.062244                 | -0.044723             | 0.012519              | -0.032203             |
|                                          |                                                 | 20.4                  | 0.57822   | 7.802601                 | -153.378057           | 64.286600             | -89.091457            |

|                                          |                     |       |         |            |               |              |               |
|------------------------------------------|---------------------|-------|---------|------------|---------------|--------------|---------------|
| <b>15a</b>                               | PH <sub>3</sub>     | 85.3  | 0.69053 | 0.105765   | -0.108668     | 0.030438     | -0.078230     |
|                                          |                     | 18.6  | 0.57700 | 10.361623  | -246.822943   | 103.658739   | -143.164204   |
| <b>15b</b>                               | PH <sub>3</sub> •   | 86.7  | 0.65610 | 0.079675   | -0.096310     | 0.030750     | -0.065560     |
|                                          |                     | 18.8  | 0.57535 | 10.120470  | -237.616915   | 100.348032   | -137.268882   |
| <b>15c</b>                               | PH <sub>2</sub> ⊖   | 87.6  | 0.65299 | 0.094451   | -0.095877     | 0.029889     | -0.065988     |
|                                          |                     | 18.7  | 0.57592 | 10.238845  | -242.279418   | 103.658739   | -140.206776   |
| <b>15d</b>                               | PH <sub>2</sub> ⊕   | 83.2  | 0.68384 | 0.109464   | -0.117273     | 0.033251     | -0.084022     |
|                                          |                     | 18.6  | 0.57971 | 10.500920  | -251.302499   | 104.820347   | -146.482152   |
| <b>16a</b>                               | SH <sub>2</sub>     | 76.5  | 0.65976 | 0.162196   | -0.231199     | 0.071427     | -0.159772     |
|                                          |                     | 17.2  | 0.57642 | 13.412808  | -379.575770   | 159.757841   | -219.817929   |
| <b>16b</b>                               | SH⊕                 | 74.4  | 0.70121 | 0.187032   | -0.276473     | 0.074837     | -0.201637     |
|                                          |                     | 17.1  | 0.57946 | 13.683332  | -390.740323   | 163.119764   | -227.620559   |
| <b>16c</b>                               | SH <sub>2</sub> ⊕   | 73.3  | 0.67546 | 0.175051   | -0.263265     | 0.075567     | -0.187698     |
|                                          |                     | 17.1  | 0.58046 | 13.724548  | -391.922601   | 163.264690   | -228.657912   |
| <b>17a</b>                               | ClH                 | 69.2  | 0.62076 | 0.231341   | -0.441498     | 0.152927     | -0.288571     |
|                                          |                     | 15.9  | 0.57510 | 17.047062  | -567.917354   | 239.534994   | -328.382360   |
| <b>17b</b>                               | ClH <sub>2</sub> ⊕  | 66.3  | 0.68978 | 0.281769   | -0.560191     | 0.156379     | -0.403812     |
|                                          |                     | 15.8  | 0.57954 | 17.596629  | -595.172446   | 247.990107   | -347.182340   |
| <b>18a</b>                               | ArH⊕                | 62.2  | 0.61675 | 0.340758   | -0.854533     | 0.296605     | -0.557928     |
|                                          |                     | 14.9  | 0.57473 | 21.293736  | -818.364883   | 347.551464   | -470.813419   |
| <b>4<sup>th</sup> period<sup>b</sup></b> |                     |       |         |            |               |              |               |
| <b>19a</b>                               | KCH <sub>3</sub> ⊖  | 268.2 | 0.30933 | 0.000665   | -0.000075     | 0.000033     | -0.000043     |
|                                          |                     | 57.1  | 0.59914 | 0.468889   | -1.511413     | 0.543639     | -0.967774     |
|                                          |                     | 14.0  | 0.57248 | 25.960089  | -1137.546925  | 488.019500   | -649.527425   |
| <b>19b</b>                               | KH•⊖                | 299.5 | 0.73886 | 0.000945   | -0.000047     | 0.000014     | -0.000033     |
|                                          |                     | 56.8  | 0.59728 | 0.468301   | -1.521794     | 0.546733     | -0.975061     |
|                                          |                     | 14.0  | 0.57234 | 25.943903  | -1136.692971  | 487.803784   | -648.889187   |
| <b>19c</b>                               | K- <i>i</i> -Pr⊖    | 272.8 | 0.35460 | 0.000723   | -0.000081     | 0.000030     | -0.000051     |
|                                          |                     | 57.0  | 0.59914 | 0.468923   | -1.512204     | 0.543722     | -0.968483     |
|                                          |                     | 14.0  | 0.57243 | 25.949909  | -1136.921133  | 487.814902   | -649.106428   |
| <b>19d</b>                               | KCH <sub>3</sub> •⊖ | 296.7 | 0.67710 | 0.000901   | -0.000052     | 0.000017     | -0.000035     |
|                                          |                     | 57.0  | 0.59980 | 0.471032   | -1.523502     | 0.546326     | -0.977177     |
|                                          |                     | 14.0  | 0.57241 | 25.952433  | -1137.148413  | 487.915944   | -649.232469   |
| <b>20a</b>                               | CaH⊖                | 218.2 | 0.60399 | 0.003596   | -0.000372     | 0.000159     | -0.000213     |
|                                          |                     | 51.6  | 0.60558 | 0.669117   | -2.728220     | 0.957251     | -1.770969     |
|                                          |                     | 13.1  | 0.57183 | 31.966382  | -1613.925010  | 692.210787   | -921.714223   |
| <b>20b</b>                               | CaH•                | 203.4 | 0.51056 | 0.003501   | -0.000654     | 0.000307     | -0.000346     |
|                                          |                     | 51.8  | 0.60578 | 0.663462   | -2.695604     | 0.943708     | -1.751896     |
|                                          |                     | 13.1  | 0.57216 | 31.596505  | -1580.177739  | 677.995499   | -902.182240   |
| <b>20c</b>                               | CaCH <sub>3</sub> ⊖ | 218.3 | 0.56414 | 0.003089   | -0.000365     | 0.000145     | -0.000219     |
|                                          |                     | 51.9  | 0.63175 | 0.698982   | -2.788345     | 0.921401     | -1.866944     |
|                                          |                     | 13.0  | 0.57489 | 32.151522  | -1635.097587  | 690.207259   | -944.890328   |
| <b>21a</b>                               | GaH <sub>2</sub> •  | 133.5 | 0.48415 | 0.020488   | -0.010958     | 0.006398     | -0.004560     |
|                                          |                     | 29.6  | 0.56866 | 6.773438   | -119.595316   | 52.812283    | -66.783033    |
|                                          |                     | 7.8   | 0.56469 | 157.974324 | -23736.946580 | 10218.022490 | -13518.749780 |
| <b>21b</b>                               | GaH <sub>2</sub> ⊖  | 134.8 | 0.48461 | 0.023907   | -0.009877     | 0.006059     | -0.003818     |
|                                          |                     | 29.6  | 0.56871 | 6.791828   | -120.171058   | 53.039081    | -67.131977    |
|                                          |                     | 7.8   | 0.56476 | 158.000619 | -23739.853930 | 10218.022490 | -13521.831440 |
| <b>21c</b>                               | GaH                 | 127.2 | 0.44342 | 0.027206   | -0.013186     | 0.008870     | -0.004317     |
|                                          |                     | 29.6  | 0.56831 | 6.772597   | -119.673835   | 52.873867    | -66.799969    |
|                                          |                     | 7.8   | 0.56449 | 157.577084 | -23641.008650 | 10183.576050 | -13457.432600 |
| <b>22a</b>                               | GeH <sub>3</sub> •  | 123.0 | 0.53633 | 0.029948   | -0.019234     | 0.009926     | -0.009308     |
|                                          |                     | 28.2  | 0.57051 | 8.029421   | -158.945125   | 69.595124    | -89.350001    |
|                                          |                     | 7.6   | 0.56348 | 175.946670 | -28311.995730 | 12288.304150 | -16023.691580 |
| <b>22b</b>                               | GeH <sub>3</sub> ⊖  | 120.7 | 0.54977 | 0.039708   | -0.021222     | 0.010867     | -0.010355     |
|                                          |                     | 28.1  | 0.57226 | 8.133695   | -161.977999   | 70.598729    | -91.379270    |
|                                          |                     | 7.6   | 0.56345 | 175.922818 | -28306.822980 | 12287.135700 | -16019.687280 |
| <b>22c</b>                               | GeH <sub>2</sub>    | 115.4 | 0.52451 | 0.045060   | -0.027320     | 0.014852     | -0.012469     |



|            |                     |                      |                               |                                     |                                           |                                        |                                           |
|------------|---------------------|----------------------|-------------------------------|-------------------------------------|-------------------------------------------|----------------------------------------|-------------------------------------------|
|            |                     | 28.1<br>7.6          | 0.57216<br>0.56330            | 8.149474<br>175.426170              | -162.630378<br>-28175.752550              | 70.855685<br>12236.617190              | -91.774692<br>-15939.135360               |
| <b>22d</b> | GeH <sub>2</sub> ⊖  | 118.1<br>28.1<br>7.6 | 0.50482<br>0.57177<br>0.56324 | 0.039471<br>8.112678<br>175.558414  | -0.022965<br>-161.422266<br>-28216.417670 | 0.012887<br>70.437875<br>12255.309380  | -0.010078<br>-90.984392<br>-15961.108290  |
| <b>23a</b> | AsH <sub>3</sub>    | 105.4<br>26.8<br>7.3 | 0.54625<br>0.57358<br>0.56281 | 0.067020<br>9.591482<br>196.953579  | -0.052902<br>-212.901362<br>-34204.711870 | 0.026374<br>92.423042<br>14870.374390  | -0.026528<br>-120.478320<br>-19334.337480 |
| <b>23b</b> | AsH <sub>3</sub> •  | 107.7<br>26.9<br>7.3 | 0.52818<br>0.57152<br>0.56278 | 0.048400<br>9.446270<br>196.888088  | -0.042703<br>-208.158337<br>-34187.107870 | 0.022311<br>90.873248<br>14863.581000  | -0.020392<br>-117.285089<br>-19323.526870 |
| <b>23c</b> | AsH <sub>2</sub> ⊖  | 108.8<br>26.9<br>7.3 | 0.55829<br>0.57273<br>0.56268 | 0.060237<br>9.534142<br>196.871189  | -0.043677<br>-210.941689<br>-34188.698730 | 0.021027<br>91.822613<br>14867.394780  | -0.022649<br>-119.119076<br>-19321.303950 |
| <b>23d</b> | AsH <sub>2</sub> ⊕  | 102.2<br>26.8<br>7.3 | 0.51891<br>0.57334<br>0.56304 | 0.071204<br>9.607931<br>197.433182  | -0.062312<br>-213.695841<br>-34335.345800 | 0.032562<br>92.779764<br>14916.797610  | -0.029750<br>-120.916077<br>-19418.548190 |
| <b>24a</b> | SeH <sub>2</sub>    | 97.3<br>25.7<br>7.0  | 0.57123<br>0.57377<br>0.56244 | 0.097376<br>11.151628<br>219.588104 | -0.096929<br>-273.511375<br>-41125.525210 | 0.044418<br>118.725351<br>17852.743400 | -0.052511<br>-154.786024<br>-23272.781810 |
| <b>24b</b> | SeH⊖                | 98.9<br>25.7<br>7.1  | 0.54170<br>0.57288<br>0.56238 | 0.086756<br>11.082408<br>219.472347 | -0.084839<br>-270.962387<br>-41092.968370 | 0.041301<br>117.927866<br>17841.985460 | -0.043538<br>-153.034521<br>-23250.982910 |
| <b>24c</b> | SeH⊕                | 95.0<br>25.6<br>7.0  | 0.59400<br>0.57468<br>0.56264 | 0.110130<br>11.252724<br>220.381413 | -0.114436<br>-277.197651<br>-41369.730580 | 0.049658<br>120.077123<br>17945.915290 | -0.064778<br>-157.120529<br>-23423.815290 |
| <b>24d</b> | SeH <sub>2</sub> ⊕  | 92.3<br>25.6<br>7.0  | 0.51887<br>0.57427<br>0.56315 | 0.104874<br>11.225393<br>220.389317 | -0.123060<br>-276.542875<br>-41330.153610 | 0.062095<br>119.791393<br>17909.673410 | -0.060965<br>-156.751481<br>-23420.480200 |
| <b>25a</b> | BrH                 | 89.9<br>24.6<br>6.8  | 0.55028<br>0.57368<br>0.56094 | 0.129446<br>12.871053<br>243.495600 | -0.165702<br>-347.221259<br>-48924.537010 | 0.077727<br>150.831234<br>21338.330580 | -0.087975<br>-196.390024<br>-27586.206430 |
| <b>25b</b> | BrH <sub>2</sub> ⊕  | 86.4<br>24.5<br>6.8  | 0.58510<br>0.57555<br>0.56129 | 0.155630<br>13.077563<br>244.635223 | -0.212625<br>-355.572975<br>-49293.031310 | 0.091679<br>153.704322<br>21474.722440 | -0.120946<br>-201.868653<br>-27818.308870 |
| <b>26a</b> | KrH⊕                | 82.0<br>23.6<br>6.6  | 0.53145<br>0.57438<br>0.56166 | 0.184994<br>14.910916<br>270.126191 | -0.317978<br>-444.594109<br>-58114.155080 | 0.152038<br>192.191470<br>25293.494340 | -0.165939<br>-252.402639<br>-32820.660740 |
| <b>26b</b> | KrCH <sub>3</sub> ⊕ | 82.4<br>23.6<br>6.6  | 0.52755<br>0.57414<br>0.56144 | 0.182179<br>14.887451<br>270.056671 | -0.311870<br>-443.581397<br>-58116.153710 | 0.150543<br>191.878323<br>25306.238710 | -0.161327<br>-251.703074<br>-32809.915000 |

<sup>a</sup>The upper values refer to the outer electron shell, the lower values refer to the inner electron shell. <sup>b</sup>The upper values refer to the outer electron shell, the middle values refer to the first inner electron shell, the lower values refer to the second (closest to the atomic nucleus) inner electron shell.

6. Table S4. Filled and empty ranges for the r(LOL-shell), p(LOL-shell), V(LOL-shell), K(LOL-shell) and H(LOL-shell) parameters of the (3,-3) LOL-shell critical point for the elements of 2<sup>nd</sup> period of periodic table.

| E            | Li                               |                                    | filled range<br>Li               | empty range<br>Li – Be           | Be                    |                                  | filled range<br>Be               | empty range<br>Be – B            | B                                |                                  |                        | filled range<br>B     |    |                   |
|--------------|----------------------------------|------------------------------------|----------------------------------|----------------------------------|-----------------------|----------------------------------|----------------------------------|----------------------------------|----------------------------------|----------------------------------|------------------------|-----------------------|----|-------------------|
|              | 3a. LiH <sup>⊖</sup>             | 3b. LiCH <sub>3</sub> <sup>⊖</sup> |                                  |                                  | 4a. BeH <sup>⊖</sup>  | 4b. BeH <sup>⊖</sup>             |                                  |                                  | 5a. BH <sub>3</sub> <sup>⊖</sup> | 5a. BH <sub>2</sub> <sup>⊖</sup> | 5c. BH                 |                       |    |                   |
| r(LOL-shell) | 159.7                            | 158.3                              | 158.3 – 159.7                    | 93.0 – 158.2                     | 90.9                  | 92.9                             | 90.9 – 92.9                      | 71.5 – 90.8                      | 71.4                             | 71.1                             | 65.4                   | 65.4 – 71.4           |    |                   |
| p(LOL-shell) | 0.00337                          | 0.00205                            | 0.00205 – 0.00337                | 0.00338 – 0.03151                | 0.03152               | 0.03167                          | 0.03152 – 0.03167                | 0.03168 – 0.07990                | 0.07991                          | 0.09105                          | 0.12509                | 0.07991 – 0.12509     |    |                   |
| V(LOL-shell) | -0.000588                        | -0.000423                          | -0.000588 ÷ -0.000423            | -0.015533 ÷ -0.000589            | -0.019778             | -0.015534                        | -0.019778 ÷ -0.015534            | -0.094082 ÷ -0.019779            | -0.095575                        | -0.094083                        | -0.141752              | -0.141752 ÷ -0.094083 |    |                   |
| K(LOL-shell) | 0.000068                         | 0.000074                           | 0.000068 – 0.000074              | 0.000075 – 0.003213              | 0.003702              | 0.003214                         | 0.003214 – 0.003702              | 0.003703 – 0.024382              | 0.025826                         | 0.024383                         | 0.029308               | 0.024383 – 0.029308   |    |                   |
| H(LOL-shell) | -0.000521                        | -0.000350                          | -0.000521 ÷ -0.000350            | -0.012319 ÷ -0.000522            | -0.016076             | -0.012320                        | -0.016076 ÷ -0.012320            | -0.069700 ÷ -0.016077            | -0.069750                        | -0.069701                        | -0.112444              | -0.112444 ÷ -0.069701 |    |                   |
| E            | empty range<br>B – C             |                                    | C                                |                                  |                       |                                  | filled range<br>C                | empty range<br>C – N             |                                  | N                                |                        |                       |    | filled range<br>N |
|              | 6a. CH <sub>3</sub> <sup>⊖</sup> | 6b. CH <sub>3</sub> <sup>⊖</sup>   | 6c. CH <sub>2</sub>              | 6d. CH <sub>2</sub> <sup>⊖</sup> | 7a. NH <sub>3</sub>   | 7b. NH <sub>3</sub> <sup>⊖</sup> |                                  | 7c. NH <sub>2</sub> <sup>⊖</sup> | 7d. NH <sub>2</sub> <sup>⊖</sup> |                                  |                        |                       |    |                   |
| r(LOL-shell) | 60.8 – 65.3                      | 59.9                               | 59.4                             | 54.0                             | 60.7                  | 54.0 – 60.7                      | 48.4 – 53.9                      | 47.1                             | 47.1                             | 48.3                             | 44.0                   | 44.0 – 48.3           |    |                   |
| p(LOL-shell) | 0.12510 – 0.14305                | 0.14306                            | 0.17572                          | 0.26379                          | 0.17408               | 0.14306 – 0.26379                | 0.26380 – 0.37875                | 0.43338                          | 0.43338                          | 0.37876                          | 0.55536                | 0.37876 – 0.55536     |    |                   |
| V(LOL-shell) | -0.279713 ÷ -0.141753            | -0.283892                          | -0.306553                        | -0.501404                        | -0.279714             | -0.501404 ÷ -0.279714            | -1.065873 ÷ -0.501405            | -1.246359                        | -1.246359                        | -1.065874                        | -1.698246              | -1.698246 ÷ -1.065874 |    |                   |
| K(LOL-shell) | 0.029309 – 0.102131              | 0.111020                           | 0.110810                         | 0.132820                         | 0.102132              | 0.102132 – 0.132820              | 0.132821 – 0.394842              | 0.431206                         | 0.431206                         | 0.394843                         | 0.473459               | 0.394843 – 0.473459   |    |                   |
| H(LOL-shell) | -0.172870 ÷ -0.112445            | -0.172871                          | -0.195743                        | -0.368584                        | -0.177583             | -0.368584 ÷ -0.172871            | -0.671030 ÷ -0.368585            | -0.815153                        | -0.815152                        | -0.671031                        | -1.224787              | -1.224787 ÷ -0.671031 |    |                   |
| E            | empty range<br>N – O             |                                    | O                                |                                  |                       | filled range<br>O                | empty range<br>O – F             |                                  | F                                |                                  | filled range<br>F      | empty range<br>F – Ne | Ne |                   |
|              | 8a. OH <sub>2</sub>              | 8b. OH <sub>2</sub> <sup>⊖</sup>   | 8c. OH <sub>2</sub> <sup>⊖</sup> | 8d. OH <sub>2</sub> <sup>⊖</sup> | 9a. FH                |                                  | 9b. FH <sub>2</sub> <sup>⊖</sup> | 10a. NeH <sup>⊖</sup>            |                                  |                                  |                        |                       |    |                   |
| r(LOL-shell) | 40.6 – 43.9                      | 40.5                               | 38.0                             | 37.4                             | 37.4 – 40.5           | 35.9 – 37.3                      | 35.8                             | 33.1                             | 33.1                             | 33.1 – 35.8                      | 31.5 – 33.0            | 31.4                  |    |                   |
| p(LOL-shell) | 0.55537 – 0.73721                | 0.73722                            | 0.96424                          | 0.99268                          | 0.73722 – 0.99268     | 0.99269 – 1.15325                | 1.15326                          | 1.54812                          | 1.54812                          | 1.15326 – 1.54812                | 1.54813 – 1.82576      | 1.82577               |    |                   |
| V(LOL-shell) | -3.080307 ÷ -1.698247            | -3.080308                          | -4.222897                        | -4.417230                        | -4.417230 ÷ -3.080308 | -6.593178 ÷ -4.417231            | -6.593179                        | -9.328061                        | -9.328061                        | -6.593179 ÷ -9.328061            | -13.979906 ÷ -9.328062 | -13.979907            |    |                   |
| K(LOL-shell) | 0.473460 – 1.152934              | 1.152935                           | 1.266951                         | 1.307202                         | 1.152935 – 1.307202   | 1.307203 – 2.642721              | 2.642722                         | 2.999893                         | 2.999893                         | 2.642722 – 2.999893              | 2.999894 – 5.721410    | 5.721411              |    |                   |
| H(LOL-shell) | -1.927372 ÷ -1.224788            | -1.927373                          | -2.955945                        | -3.110028                        | -3.110028 ÷ -1.927373 | -3.950456 ÷ -3.110029            | -3.950457                        | -6.328168                        | -6.328168                        | -3.950457 ÷ -6.328168            | -8.258496 ÷ -6.328169  | -8.258497             |    |                   |

7. Table S5. Filled and empty ranges for the r(LOL-shell), p(LOL-shell), V(LOL-shell), K(LOL-shell) and H(LOL-shell) parameters of the (3,-3) LOL-shell critical point for the elements of 3<sup>rd</sup> period of periodic table.

| E                         | Na                      |                          |                           |                           | filled range<br>Na        | empty range<br>Na – Mg    | Mg                      |                       | filled range<br>Mg        | empty range<br>Mg – Al    |                           |
|---------------------------|-------------------------|--------------------------|---------------------------|---------------------------|---------------------------|---------------------------|-------------------------|-----------------------|---------------------------|---------------------------|---------------------------|
|                           | 11a. NaH●⊖              | 11b. NaCH <sub>3</sub> ⊖ | 11c. NaH⊖                 | 11d. NaCH <sub>3</sub> ●⊖ |                           |                           | 12a. MgH●               | 12b. MgH⊖             |                           |                           |                           |
| r(LOL-shell) <sup>a</sup> | 216.9                   | 255.7                    | 239.2                     | 218.2                     | 216.9 – 255.7             | 144.6 – 216.8             | 141.2                   | 144.5                 | 141.2 – 144.5             | 118.2 – 141.1             |                           |
| r(LOL-shell) <sup>b</sup> | 28.2                    | 28.2                     | 28.2                      | 28.2                      | 28.2                      | 25.1 – 28.1               | 25.0                    | 25.0                  | 25.0                      | 22.7 – 24.9               |                           |
| p(LOL-shell) <sup>a</sup> | 0.00203                 | 0.00095                  | 0.00114                   | 0.00190                   | 0.00095 – 0.00203         | 0.00204 – 0.01043         | 0.01044                 | 0.01101               | 0.01044 – 0.01101         | 0.01102 – 0.02604         |                           |
| p(LOL-shell) <sup>b</sup> | 2.64820                 | 2.63635                  | 2.63939                   | 2.65596                   | 2.63635 – 2.65596         | 2.65597 – 3.95614         | 3.95615                 | 3.98265               | 3.95615 – 3.98265         | 3.98266 – 5.56875         |                           |
| V(LOL-shell) <sup>a</sup> | -0.000225               | -0.000088                | -0.000112                 | -0.000199                 | -0.000225 ÷ -0.000088     | -0.002837 ÷ -0.000226     | -0.003528               | -0.002838             | -0.003528 ÷ -0.002838     | -0.012290 ÷ -0.003529     |                           |
| V(LOL-shell) <sup>b</sup> | -26.020247              | -25.854581               | -25.892888                | -26.258947                | -26.258947 ÷ -25.854581   | -50.431880 ÷ -26.258948   | -50.909024              | -50.431881            | -50.909024 ÷ -50.431881   | -87.721243 ÷ -50.909025   |                           |
| K(LOL-shell) <sup>a</sup> | 0.000050                | 0.000018                 | 0.000022                  | 0.000490                  | 0.000018 – 0.00050        | 0.000051 – 0.000893       | 0.001103                | 0.000893              | 0.000894 – 0.001103       | 0.001104 – 0.003454       |                           |
| K(LOL-shell) <sup>b</sup> | 11.029371               | 10.978544                | 10.988480                 | 11.134436                 | 10.978544 – 11.134436     | 11.134437 – 21.168404     | 21.168405               | 21.313665             | 21.168405 – 21.313665     | 21.313666 – 37.154763     |                           |
| H(LOL-shell) <sup>a</sup> | -0.000174               | -0.000069                | -0.000090                 | -0.000149                 | -0.000174 ÷ -0.000069     | -0.001944 ÷ -0.000175     | -0.002426               | -0.001945             | -0.002426 ÷ -0.001945     | -0.008835 ÷ -0.002427     |                           |
| H(LOL-shell) <sup>b</sup> | -14.990876              | -14.876036               | -14.904408                | -15.124511                | -15.124511 ÷ -14.876036   | -29.263475 ÷ -15.124512   | -29.263476              | -29.595359            | -29.595359 ÷ -29.263476   | -50.566477 ÷ -29.595360   |                           |
| E                         | Al                      |                          |                           | filled range<br>Al        | empty range<br>Al – Si    | Si                        |                         |                       | filled range<br>Si        | empty range<br>Si – P     |                           |
|                           | 13a. AlH <sub>2</sub> ● | 13b. AlH <sub>2</sub> ⊖  | 13c. AlH                  |                           |                           | 14a. SiH <sub>3</sub> ●   | 14b. SiH <sub>3</sub> ⊖ | 14c. SiH <sub>2</sub> |                           |                           |                           |
| r(LOL-shell) <sup>a</sup> | 117.2                   | 118.1                    | 113.6                     | 113.6 – 118.1             | 101.5 – 113.5             | 101.4                     | 100.1                   | 96.9                  | 96.9 – 101.4              | 87.7 – 96.8               |                           |
| r(LOL-shell) <sup>b</sup> | 22.6                    | 22.5                     | 22.5                      | 22.5 – 22.6               | 20.6 – 22.4               | 20.5                      | 20.4                    | 20.4                  | 20.4 – 20.5               | 18.9 – 20.3               |                           |
| p(LOL-shell) <sup>a</sup> | 0.02605                 | 0.02879                  | 0.02938                   | 0.02605 – 0.02938         | 0.02939 – 0.04621         | 0.04622                   | 0.05743                 | 0.06224               | 0.04622 – 0.06224         | 0.06225 – 0.07967         |                           |
| p(LOL-shell) <sup>b</sup> | 5.56876                 | 5.60602                  | 5.67572                   | 5.56876 – 5.67572         | 5.67573 – 7.57229         | 7.57230                   | 7.69378                 | 7.80260               | 7.57230 – 7.80260         | 7.80261 – 10.12046        |                           |
| V(LOL-shell) <sup>a</sup> | -0.014256               | -0.012291                | -0.013549                 | -0.014256 ÷ -0.012291     | -0.037800 ÷ -0.014257     | -0.037801                 | -0.039153               | -0.044723             | -0.044723 ÷ -0.037801     | -0.095876 ÷ -0.044724     |                           |
| V(LOL-shell) <sup>b</sup> | -87.721242              | -88.668740               | -90.105529                | -90.105529 ÷ -87.721242   | -146.578009 ÷ -90.105530  | -146.578010               | -150.465611             | -153.378057           | -153.378057 ÷ -146.578010 | -237.616914 ÷ -153.378058 |                           |
| K(LOL-shell) <sup>a</sup> | 0.003752                | 0.003455                 | 0.004406                  | 0.003455 – 0.004406       | 0.004407 – 0.010721       | 0.010872                  | 0.010722                | 0.012519              | 0.010722 – 0.012519       | 0.012520 – 0.029888       |                           |
| K(LOL-shell) <sup>b</sup> | 37.154764               | 37.491259                | 37.853383                 | 37.154764 – 37.853383     | 37.853384 – 62.073157     | 62.073158                 | 63.477324               | 64.286600             | 62.073158 – 64.286600     | 64.286601 – 100.348031    |                           |
| H(LOL-shell) <sup>a</sup> | -0.010504               | -0.008836                | -0.009143                 | -0.010504 ÷ -0.008836     | -0.026930 ÷ -0.010505     | -0.026929                 | -0.028430               | -0.032203             | -0.032203 ÷ -0.026931     | -0.065559 ÷ -0.032204     |                           |
| H(LOL-shell) <sup>b</sup> | -50.566478              | -51.177481               | -52.252146                | -52.252146 ÷ -50.566478   | -84.504851 ÷ -52.252147   | -84.504852                | -86.988287              | -89.091457            | -89.091457 ÷ -84.504852   | -137.268881 ÷ -89.091458  |                           |
| E                         | P                       |                          |                           |                           | filled range<br>P         | empty range<br>P – S      | S                       |                       |                           | filled range<br>S         | empty range<br>S – Cl     |
|                           | 15a. PH <sub>3</sub>    | 15b. PH <sub>3</sub> ●   | 15c. PH <sub>2</sub> ⊖    | 15d. PH <sub>2</sub> ⊕    |                           |                           | 16a. SH <sub>2</sub>    | 16b. SH⊕              | 16c. SH <sub>2</sub> ⊖    |                           |                           |
| r(LOL-shell) <sup>a</sup> | 85.3                    | 86.7                     | 87.6                      | 83.2                      | 83.2 – 87.6               | 76.6 – 83.1               | 76.5                    | 74.4                  | 73.3                      | 73.3 – 76.5               | 69.3 – 73.2               |
| r(LOL-shell) <sup>b</sup> | 18.6                    | 18.8                     | 18.7                      | 18.6                      | 18.6 – 18.8               | 17.3 – 18.5               | 17.2                    | 17.1                  | 17.1                      | 17.1 – 17.2               | 16.0 – 17.0               |
| p(LOL-shell) <sup>a</sup> | 0.10577                 | 0.07968                  | 0.09445                   | 0.10946                   | 0.07968 – 0.10946         | 0.10947 – 0.16219         | 0.16220                 | 0.18703               | 0.17505                   | 0.16220 – 0.18703         | 0.18704 – 0.23134         |
| p(LOL-shell) <sup>b</sup> | 10.36162                | 10.12047                 | 10.23885                  | 10.50092                  | 10.12047 – 10.50092       | 10.50093 – 13.41280       | 13.41281                | 13.68333              | 13.72454                  | 13.41281 – 13.72454       | 13.72455 – 17.04705       |
| V(LOL-shell) <sup>a</sup> | -0.108668               | -0.096310                | -0.095877                 | -0.117273                 | -0.117273 ÷ -0.095877     | -0.231198 ÷ -0.117274     | -0.231199               | -0.276473             | -0.263265                 | -0.276473 ÷ -0.231199     | -0.441497 ÷ -0.276474     |
| V(LOL-shell) <sup>b</sup> | -246.822943             | -237.616915              | -242.279418               | -251.302499               | -251.302499 ÷ -237.616915 | -379.575769 ÷ -251.302500 | -379.575770             | -390.740323           | -391.922601               | -391.922601 ÷ -379.575770 | -567.917353 ÷ -391.922602 |
| K(LOL-shell) <sup>a</sup> | 0.030438                | 0.030750                 | 0.029889                  | 0.033251                  | 0.029889 – 0.033251       | 0.033252 – 0.071426       | 0.071427                | 0.074837              | 0.075567                  | 0.071427 – 0.075567       | 0.075568 – 0.152926       |
| K(LOL-shell) <sup>b</sup> | 103.658739              | 100.348032               | 103.658739                | 104.820347                | 100.348032 – 104.820347   | 104.820348 – 159.757840   | 159.757841              | 163.119764            | 163.264690                | 159.757841 – 163.264690   | 163.264691 – 239.534993   |
| H(LOL-shell) <sup>a</sup> | -0.078230               | -0.065560                | -0.065988                 | -0.084022                 | -0.084022 ÷ -0.065560     | -0.159771 ÷ -0.084023     | -0.159772               | -0.201637             | -0.187698                 | -0.201637 ÷ -0.159772     | -0.288570 ÷ -0.201638     |
| H(LOL-shell) <sup>b</sup> | -143.164204             | -137.268882              | -140.206776               | -146.482152               | -146.482152 ÷ -137.268882 | -219.817928 ÷ -146.482153 | -219.817929             | -227.620559           | -228.657912               | -228.657912 ÷ -219.817929 | -328.382359 ÷ -228.657913 |
| E                         | Cl                      |                          | filled range<br>Cl        | empty range<br>Cl – Ar    | Ar                        |                           |                         |                       |                           |                           |                           |
|                           | 17a. ClH                | 17b. ClH <sub>2</sub> ⊕  |                           |                           |                           | 18a. ArH⊕                 |                         |                       |                           |                           |                           |
| r(LOL-shell) <sup>a</sup> | 69.2                    | 66.3                     | 66.3 – 69.2               | 62.3 – 66.2               | 62.2                      |                           |                         |                       |                           |                           |                           |
| r(LOL-shell) <sup>b</sup> | 15.9                    | 15.8                     | 15.8 – 15.9               | 15.0 – 15.7               | 14.9                      |                           |                         |                       |                           |                           |                           |
| p(LOL-shell) <sup>a</sup> | 0.23134                 | 0.28177                  | 0.23135 – 0.28177         | 0.28178 – 0.34075         | 0.34076                   |                           |                         |                       |                           |                           |                           |
| p(LOL-shell) <sup>b</sup> | 17.04706                | 17.59663                 | 17.04706 – 17.59663       | 17.59664 – 21.29373       | 21.29374                  |                           |                         |                       |                           |                           |                           |
| V(LOL-shell) <sup>a</sup> | -0.441498               | -0.560191                | -0.560191 ÷ -0.441498     | -0.854532 ÷ -0.560192     | -0.854533                 |                           |                         |                       |                           |                           |                           |
| V(LOL-shell) <sup>b</sup> | -567.917354             | -595.172446              | -595.172446 ÷ -567.917354 | -818.364882 ÷ -595.172447 | -818.364883               |                           |                         |                       |                           |                           |                           |
| K(LOL-shell) <sup>a</sup> | 0.152927                | 0.156379                 | 0.152927 – 0.156379       | 0.156380 – 0.296604       | 0.296605                  |                           |                         |                       |                           |                           |                           |
| K(LOL-shell) <sup>b</sup> | 239.534994              | 247.990107               | 239.534994 – 247.990107   | 247.990108 – 347.551463   | 347.551464                |                           |                         |                       |                           |                           |                           |
| H(LOL-shell) <sup>a</sup> | -0.288571               | -0.403812                | -0.403812 ÷ -0.288571     | -0.557927 ÷ -0.403813     | -0.557928                 |                           |                         |                       |                           |                           |                           |
| H(LOL-shell) <sup>b</sup> | -328.382360             | -347.182340              | -347.182340 ÷ -328.382360 | -470.813418 ÷ -347.182341 | -470.813419               |                           |                         |                       |                           |                           |                           |



|                                 |                              |                             |                             |                               |                             |                             |                             |                              |                             |
|---------------------------------|------------------------------|-----------------------------|-----------------------------|-------------------------------|-----------------------------|-----------------------------|-----------------------------|------------------------------|-----------------------------|
| <b>K(LOL-shell)<sup>c</sup></b> | 12236.61719 – 12288.30415    | 12288.30416 – 14863.580     | 14870.37439                 | 14863.581                     | 14867.39478                 | 14916.79761                 | 14863.581 – 14916.79761     | 14916.79762 – 17841.98545    |                             |
| <b>H(LOL-shell)<sup>a</sup></b> | -0.012469 ÷ -0.009308        | -0.020391 ÷ -0.012470       | -0.026528                   | -0.020392                     | -0.022649                   | -0.029750                   | -0.029750 ÷ -0.020392       | -0.043537 ÷ -0.029751        |                             |
| <b>H(LOL-shell)<sup>b</sup></b> | -91.774693 ÷ -89.35000       | -117.285088 ÷ -91.774694    | -120.478320                 | -117.285089                   | -119.119076                 | -120.916077                 | -120.916077 ÷ -117.285089   | -153.034520 ÷ -120.916078    |                             |
| <b>H(LOL-shell)<sup>c</sup></b> | -16023.69158 ÷ -15939.13536  | -19321.30394 ÷ -16023.69159 | -19334.33748                | -19323.52687                  | -19321.30395                | -19418.54819                | -19418.54819 ÷ -19321.30395 | -23250.98290 ÷ -19418.54820  |                             |
| <b>E</b>                        | <b>Se</b>                    |                             |                             |                               | <b>filled range</b>         | <b>empty range</b>          | <b>Br</b>                   |                              | <b>filled range</b>         |
| <b>E-X</b>                      | <b>24a. SeH<sub>2</sub></b>  | <b>24b. SeH<sup>⊖</sup></b> | <b>24c. SeH<sup>⊕</sup></b> | <b>24d. SeH<sub>2</sub>⊕</b>  | <b>Se</b>                   | <b>Se – Br</b>              | <b>25a. BrH</b>             | <b>25b. BrH<sub>2</sub>⊕</b> | <b>Br</b>                   |
| <b>r(LOL-shell)<sup>a</sup></b> | 97.3                         | 98.9                        | 95.0                        | 92.3                          | 92.3 – 98.9                 | 90.0 – 92.4                 | 89.9                        | 86.4                         | 86.4 – 89.9                 |
| <b>r(LOL-shell)<sup>b</sup></b> | 25.7                         | 25.7                        | 25.6                        | 25.6                          | 25.6 – 25.7                 | 24.7 – 25.5                 | 24.6                        | 24.5                         | 24.5 – 24.6                 |
| <b>r(LOL-shell)<sup>c</sup></b> | 7.0                          | 7.1                         | 7.0                         | 7.0                           | 7.0 – 7.1                   | <0.2                        | 6.8                         | 6.8                          | 6.8                         |
| <b>ρ(LOL-shell)<sup>a</sup></b> | 0.09738                      | 0.08676                     | 0.11013                     | 0.10487                       | 0.08676 – 0.11013           | 0.11014 – 0.12944           | 0.12945                     | 0.15563                      | 0.12945 – 0.15563           |
| <b>ρ(LOL-shell)<sup>b</sup></b> | 11.15163                     | 11.08241                    | 11.25272                    | 11.22539                      | 11.08241 – 11.25272         | 11.25273 – 12.87104         | 12.87105                    | 13.07756                     | 12.87105 – 13.07756         |
| <b>ρ(LOL-shell)<sup>c</sup></b> | 219.58810                    | 219.47235                   | 220.38141                   | 220.38932                     | 219.47235 – 220.38932       | 220.38933 – 243.49559       | 243.49560                   | 244.63522                    | 243.49560 – 244.63522       |
| <b>V(LOL-shell)<sup>a</sup></b> | -0.096929                    | -0.084839                   | -0.114436                   | -0.123060                     | -0.123060 ÷ -0.084839       | -0.165701 ÷ -0.123061       | -0.165702                   | -0.212625                    | -0.212625 ÷ -0.165702       |
| <b>V(LOL-shell)<sup>b</sup></b> | -273.511375                  | -270.962387                 | -277.197651                 | -276.542875                   | -277.197651 ÷ -270.962387   | -347.221258 ÷ -277.197652   | -347.221259                 | -355.572975                  | -355.572975 ÷ -347.221259   |
| <b>V(LOL-shell)<sup>c</sup></b> | -41125.52521                 | -41092.96837                | -41369.73058                | -41330.15361                  | -41369.73058 ÷ -41092.96837 | -48924.53700 ÷ -41369.73059 | -48924.53701                | -49293.03131                 | -49293.03131 ÷ -48924.53701 |
| <b>K(LOL-shell)<sup>a</sup></b> | 0.044418                     | 0.041301                    | 0.049658                    | 0.062095                      | 0.041301 – 0.062095         | 0.062096 – 0.077726         | 0.077727                    | 0.091679                     | 0.077727 – 0.091679         |
| <b>K(LOL-shell)<sup>b</sup></b> | 118.725351                   | 117.927866                  | 120.077123                  | 119.791393                    | 117.927866 – 120.077123     | 120.077124 – 150.831233     | 150.831234                  | 153.704322                   | 150.831234 – 153.704322     |
| <b>K(LOL-shell)<sup>c</sup></b> | 17852.7434                   | 17841.98546                 | 17945.91529                 | 17909.67341                   | 17841.98546 – 17945.91529   | 17945.91530 – 21338.33057   | 21338.33058                 | 21474.72244                  | 21338.33058 – 21474.72244   |
| <b>H(LOL-shell)<sup>a</sup></b> | -0.052511                    | -0.043538                   | -0.064778                   | -0.060965                     | -0.064778 ÷ -0.043538       | -0.087974 ÷ -0.064779       | -0.087975                   | -0.120946                    | -0.120946 ÷ -0.087975       |
| <b>H(LOL-shell)<sup>b</sup></b> | -154.786024                  | -153.034521                 | -157.120529                 | -156.751481                   | -157.120529 ÷ -153.034521   | -196.390023 ÷ -157.120530   | -196.390024                 | -201.868653                  | -201.868653 ÷ -196.390024   |
| <b>H(LOL-shell)<sup>c</sup></b> | -23272.78181                 | -23250.98291                | -23423.81529                | -23420.48020                  | -23423.81529 ÷ -23250.98291 | -27586.20642 ÷ -23423.81530 | -27586.20643                | -27818.30887                 | -27818.30887 ÷ -27586.20643 |
| <b>E</b>                        | <b>empty range</b>           |                             | <b>Kr</b>                   |                               |                             |                             |                             |                              |                             |
| <b>E-X</b>                      | <b>Br – Kr</b>               |                             | <b>26a. KrH<sup>⊕</sup></b> | <b>26b. KrCH<sub>3</sub>⊕</b> |                             |                             |                             |                              |                             |
| <b>r(LOL-shell)<sup>a</sup></b> | 82.5 – 86.3                  |                             | 82.0                        | 82.4                          |                             |                             |                             |                              |                             |
| <b>r(LOL-shell)<sup>b</sup></b> | 23.7 – 24.4                  |                             | 23.6                        | 23.6                          |                             |                             |                             |                              |                             |
| <b>r(LOL-shell)<sup>c</sup></b> | <0.2                         |                             | 6.6                         | 6.6                           |                             |                             |                             |                              |                             |
| <b>ρ(LOL-shell)<sup>a</sup></b> | 0.15564 – 0.18217            |                             | 0.18499                     | 0.18218                       |                             |                             |                             |                              |                             |
| <b>ρ(LOL-shell)<sup>b</sup></b> | 13.07757 – 14.88744          |                             | 14.91092                    | 14.88745                      |                             |                             |                             |                              |                             |
| <b>ρ(LOL-shell)<sup>c</sup></b> | 244.63523 – 270.05666        |                             | 270.12619                   | 270.05667                     |                             |                             |                             |                              |                             |
| <b>V(LOL-shell)<sup>a</sup></b> | -0.311869 ÷ -0.212626        |                             | -0.317978                   | -0.311870                     |                             |                             |                             |                              |                             |
| <b>V(LOL-shell)<sup>b</sup></b> | -443.581396 ÷ -355.572976    |                             | -444.594109                 | -443.581397                   |                             |                             |                             |                              |                             |
| <b>V(LOL-shell)<sup>c</sup></b> | -58114.15507 ÷ -49293.03132  |                             | -58114.15508                | -58116.15371                  |                             |                             |                             |                              |                             |
| <b>K(LOL-shell)<sup>a</sup></b> | 0.091680 – 0.150542          |                             | 0.152038                    | 0.150543                      |                             |                             |                             |                              |                             |
| <b>K(LOL-shell)<sup>b</sup></b> | 153.704323 – 191.878322      |                             | 192.19147                   | 191.878323                    |                             |                             |                             |                              |                             |
| <b>K(LOL-shell)<sup>c</sup></b> | 21474.72245 – 25293.49433    |                             | 25293.49434                 | 25306.23871                   |                             |                             |                             |                              |                             |
| <b>H(LOL-shell)<sup>a</sup></b> | -0.161326 ÷ -0.120947        |                             | -0.165939                   | -0.161327                     |                             |                             |                             |                              |                             |
| <b>H(LOL-shell)<sup>b</sup></b> | -251.703073 ÷ -201.868654    |                             | -252.402639                 | -251.703074                   |                             |                             |                             |                              |                             |
| <b>H(LOL-shell)<sup>c</sup></b> | -32809.914990 ÷ -27818.30888 |                             | -32820.66074                | -32809.91500                  |                             |                             |                             |                              |                             |

<sup>a</sup>The values refer to the outer electron shell; <sup>b</sup>the values refer to the first inner electron shell;

<sup>c</sup>the lower values refer to the second (closest to the atomic nucleus) inner electron shell.

**9. Table S7.** The value of electronegativity, atomic, covalent, van der Waals radii and energy of ionization for elements of 1<sup>st</sup>, 2<sup>nd</sup>, 3<sup>rd</sup> and 4<sup>th</sup> periods of periodic table.

| №  | element | electronegativity $\chi$ ,<br>Pauling | r(LOL),<br>pm | radii, pm           |                       |                            | energy of<br>ionization <sup>4</sup> , eV |
|----|---------|---------------------------------------|---------------|---------------------|-----------------------|----------------------------|-------------------------------------------|
|    |         |                                       |               | atomic <sup>1</sup> | covalent <sup>2</sup> | van der Waals <sup>3</sup> |                                           |
| 1  | H       | 2.20                                  | 8.6           | 53                  | 32                    | 120                        | 13.60                                     |
| 2  | He      | –                                     | 4.2           | 32                  | 46                    | 143                        | 24.59                                     |
| 3  | Li      | 0.98                                  | 159.7         | 167                 | 133                   | 212                        | 5.39                                      |
| 4  | Be      | 1.57                                  | 90.9          | 112                 | 102                   | 198                        | 9.32                                      |
| 5  | B       | 2.04                                  | 71.4          | 87                  | 85                    | 191                        | 8.30                                      |
| 6  | C       | 2.55                                  | 59.9          | 67                  | 75                    | 177                        | 11.26                                     |
| 7  | N       | 3.04                                  | 47.1          | 56                  | 71                    | 166                        | 14.53                                     |
| 8  | O       | 3.44                                  | 40.5          | 48                  | 63                    | 150                        | 13.62                                     |
| 9  | F       | 3.98                                  | 35.8          | 42                  | 64                    | 146                        | 17.42                                     |
| 10 | Ne      | –                                     | 31.4          | 38                  | 67                    | 158                        | 21.56                                     |
| 11 | Na      | 0.93                                  | 216.9         | 190                 | 155                   | 250                        | 5.14                                      |
| 12 | Mg      | 1.31                                  | 141.2         | 145                 | 139                   | 251                        | 7.65                                      |
| 13 | Al      | 1.61                                  | 117.2         | 118                 | 126                   | 225                        | 5.99                                      |
| 14 | Si      | 1.90                                  | 101.4         | 111                 | 116                   | 219                        | 8.15                                      |
| 15 | P       | 2.19                                  | 85.3          | 98                  | 111                   | 190                        | 10.49                                     |
| 16 | S       | 2.58                                  | 76.5          | 88                  | 103                   | 189                        | 10.36                                     |
| 17 | Cl      | 3.16                                  | 69.2          | 79                  | 99                    | 182                        | 12.97                                     |
| 18 | Ar      | –                                     | 62.2          | 71                  | 96                    | 183                        | 15.76                                     |
| 19 | K       | 0.82                                  | 268.2         | 243                 | 196                   | 273                        | 4.34                                      |
| 20 | Ca      | 1.00                                  | 218.2         | 194                 | 171                   | 262                        | 6.11                                      |
| 31 | Ga      | 1.81                                  | 133.5         | 136                 | 124                   | 232                        | 6.00                                      |
| 32 | Ge      | 2.01                                  | 123.0         | 125                 | 121                   | 229                        | 7.90                                      |
| 33 | As      | 2.18                                  | 105.4         | 114                 | 121                   | 188                        | 9.79                                      |
| 34 | Se      | 2.55                                  | 97.3          | 103                 | 116                   | 182                        | 9.75                                      |
| 35 | Br      | 2.96                                  | 89.9          | 94                  | 114                   | 186                        | 11.81                                     |
| 36 | Kr      | –                                     | 82.0          | 88                  | 117                   | 225                        | 14.0                                      |

1. E. Clementi, D. L. Raimondi and W. P. Reinhardt, *J. Chem. Phys.* 1967, **47**, 1300 – 1307.
2. P. Pyykkö and M. Atsumi, *Chem. Eur. J.* 2009, **15**, 186 – 197.
3. S. Alvarez, *Dalton Trans.*, 2013, **42**, 8617.
4. J. E. Sansonetti, W.C. Martin and S. L. Yong, *Handbook of Basic Atomic Spectroscopic Data*. 2004, National Institute of Standards and Technology, Gaithersburg, USA.

**10. Table S8.** The values of the calculated parameters for the (3,-3) LOL and ELF critical points related to the electron shells of element hydrides and methyls **3a-26a**<sup>a</sup>: the distance between the (3,-3) CPs LOL, ELF and the element nucleus ( $r(\text{LOL-shell})$  and  $r(\text{ELF-shell})$  in pm), the value of LOL and ELF at the (3,-3) LOL-shell and ELF-shell critical points, the value of  $\rho$  electron density at the (3,-3) LOL and ELF critical points ( $\rho(\text{LOL-shell})$  and  $\rho(\text{ELF-shell})$ , in a.u.), the value of total H electron energy density at the (3,-3) LOL and ELF critical points ( $H(\text{LOL-shell})$  and  $H(\text{ELF-shell})$ , in a.u).

| No                           | structure                  | shell number   | $r(\text{LOL-shell})$ | $r(\text{ELF-shell})$ | LOL-shell | ELF-shell | $\rho(\text{LOL-shell})$ | $\rho(\text{ELF-shell})$ | $H(\text{LOL-shell})$ | $H(\text{ELF-shell})$ |
|------------------------------|----------------------------|----------------|-----------------------|-----------------------|-----------|-----------|--------------------------|--------------------------|-----------------------|-----------------------|
| <b>1<sup>st</sup> period</b> |                            |                |                       |                       |           |           |                          |                          |                       |                       |
| <b>1a</b>                    | H                          |                | 8.6                   |                       | 0.77361   |           | 0.235706                 |                          | -1.259776             |                       |
| <b>2a</b>                    | HeH $\oplus$               |                | 4.2                   |                       | 0.77110   |           | 2.637644                 |                          | -56.753499            |                       |
| <b>2<sup>nd</sup> period</b> |                            |                |                       |                       |           |           |                          |                          |                       |                       |
| <b>3a</b>                    | LiH $\bullet\ominus$       | 1 <sup>b</sup> | 159.7                 | 187.2                 | 0.83583   | 0.99772   | 0.003370                 | 0.002758                 | -0.000521             | -0.000309             |
| <b>4a</b>                    | BeH $\bullet$              | 1              | 90.9                  | 134.8                 | 0.79328   | 0.99998   | 0.031525                 | 0.013465                 | -0.016076             | -0.002713             |
| <b>5a</b>                    | BH <sub>2</sub> $\bullet$  | 1              | 71.4                  | 128.6                 | 0.70851   | 0.99096   | 0.079912                 | 0.017221                 | -0.069750             | -0.002992             |
| <b>6a</b>                    | CH <sub>3</sub> $\bullet$  | 1              | 59.9                  | 93.3                  | 0.58975   | 0.91592   | 0.143062                 | 0.046673                 | -0.172871             | -0.017107             |
| <b>7a</b>                    | NH <sub>3</sub>            | 1              | 47.1                  | 77.6                  | 0.62301   | 0.95373   | 0.433379                 | 0.126944                 | -0.815153             | -0.055146             |
| <b>8a</b>                    | OH <sub>2</sub>            | 1              | 40.5                  | 59.5                  | 0.59972   | 0.91895   | 0.737219                 | 0.300631                 | -1.927373             | -0.253280             |
| <b>9a</b>                    | FH                         | 1              | 35.8                  | 50.6                  | 0.57947   | 0.88686   | 1.153258                 | 0.511776                 | -3.950457             | -0.634354             |
| <b>10a</b>                   | NeH $\oplus$               | 1              | 31.4                  | 44.2                  | 0.57783   | 0.88170   | 1.825768                 | 0.809814                 | -8.258497             | -1.373279             |
| <b>3<sup>rd</sup> period</b> |                            |                |                       |                       |           |           |                          |                          |                       |                       |
| <b>11a</b>                   | NaH $\bullet\ominus$       | 1 <sup>b</sup> | 216.9                 | 233.2                 | 0.74142   | 0.98629   | 0.002036                 | 0.001804                 | -0.000175             | -0.000135             |
|                              |                            | 2 <sup>c</sup> | 28.2                  | 39.4                  | 0.56889   | 0.86410   | 2.648198                 | 1.201658                 | -14.990877            | -2.864951             |
| <b>12a</b>                   | MgH $\bullet$              | 1              | 141.2                 | 182.9                 | 0.65696   | 0.99895   | 0.010438                 | 0.005135                 | -0.002426             | -0.000546             |
|                              |                            | 2              | 25.0                  | 34.3                  | 0.57309   | 0.86750   | 3.956147                 | 1.872124                 | -29.263476            | -6.081514             |
| <b>13a</b>                   | AlH <sub>2</sub> $\bullet$ | 1              | 117.2                 | 162.8                 | 0.71808   | 0.99773   | 0.026050                 | 0.010556                 | -0.010504             | -0.001682             |
|                              |                            | 2              | 22.6                  | 30.5                  | 0.57484   | 0.86876   | 5.568760                 | 2.706365                 | -50.566478            | -11.493671            |
| <b>14a</b>                   | SiH <sub>3</sub> $\bullet$ | 1              | 101.4                 | 141.4                 | 0.69177   | 0.98628   | 0.046218                 | 0.018412                 | -0.026929             | -0.004150             |
|                              |                            | 2              | 20.5                  | 27.7                  | 0.57459   | 0.86862   | 7.572301                 | 3.684395                 | -84.504852            | -19.305191            |
| <b>15a</b>                   | PH <sub>3</sub>            | 1              | 85.3                  | 118.8                 | 0.69053   | 0.98975   | 0.105765                 | 0.043576                 | -0.078230             | -0.011326             |
|                              |                            | 2              | 18.6                  | 25.0                  | 0.57700   | 0.86725   | 10.361623                | 5.104863                 | -143.164204           | -34.040473            |
| <b>16a</b>                   | SH <sub>2</sub>            | 1              | 76.5                  | 99.5                  | 0.65976   | 0.96289   | 0.162196                 | 0.084397                 | -0.159772             | -0.038789             |
|                              |                            | 2              | 17.2                  | 22.7                  | 0.57642   | 0.86531   | 13.412808                | 6.853390                 | -219.817929           | -56.826740            |
| <b>17a</b>                   | ClH                        | 1              | 69.2                  | 87.0                  | 0.62076   | 0.91950   | 0.231341                 | 0.132297                 | -0.288571             | -0.086352             |
|                              |                            | 2              | 15.9                  | 20.9                  | 0.57510   | 0.86320   | 17.047062                | 8.961013                 | -328.382360           | -90.347600            |

|                              |                                |                |       |       |         |         |            |            |               |               |
|------------------------------|--------------------------------|----------------|-------|-------|---------|---------|------------|------------|---------------|---------------|
| <b>18a</b>                   | ArH <sup>⊕</sup>               | 1              | 62.2  | 77.8  | 0.61675 | 0.91627 | 0.340758   | 0.194675   | -0.557928     | -0.161556     |
|                              |                                | 2              | 14.9  | 19.2  | 0.57473 | 0.86083 | 21.293736  | 11.600451  | -470.813419   | -142.912160   |
| <b>4<sup>th</sup> period</b> |                                |                |       |       |         |         |            |            |               |               |
| <b>19a</b>                   | KCH <sub>3</sub> <sup>⊖</sup>  | 1 <sup>b</sup> | 268.2 | 277.4 | 0.30933 | 0.37121 | 0.000665   | 0.000606   | -0.000043     | -0.000035     |
|                              |                                | 2 <sup>c</sup> | 57.1  | 70.1  | 0.59914 | 0.88222 | 0.468889   | 0.283535   | -0.967774     | -0.305399     |
|                              |                                | 3 <sup>d</sup> | 14.0  | 17.8  | 0.57248 | 0.85580 | 25.960089  | 14.722280  | -649.527425   | -215.780357   |
| <b>20a</b>                   | CaH <sup>⊖</sup>               | 1              | 218.2 | 246.1 | 0.60399 | 0.98055 | 0.003596   | 0.002618   | -0.000213     | -0.000158     |
|                              |                                | 2              | 51.6  | 61.8  | 0.60558 | 0.88581 | 0.669117   | 0.432462   | -1.770969     | -0.679772     |
|                              |                                | 3              | 13.1  | 16.5  | 0.57183 | 0.85350 | 31.966382  | 18.533133  | -921.714223   | -321.797323   |
| <b>21a</b>                   | GaH <sub>2</sub> <sup>•</sup>  | 1              | 133.5 | 170.8 | 0.48415 | 0.96622 | 0.020488   | 0.007941   | -0.004560     | -0.000607     |
|                              |                                | 2              | 29.6  | 34.4  | 0.56866 | 0.77580 | 6.773438   | 4.642486   | 66.783033     | -31.511063    |
|                              |                                | 3              | 7.8   | 9.0   | 0.56469 | 0.80150 | 157.974324 | 116.853307 | -13518.749780 | -7464.670300  |
| <b>22a</b>                   | GeH <sub>3</sub> <sup>•</sup>  | 1              | 123.0 | 158.7 | 0.53633 | 0.96531 | 0.029948   | 0.011826   | -0.009308     | -0.001562     |
|                              |                                | 2              | 28.2  | 32.9  | 0.57051 | 0.77751 | 8.029421   | 5.477499   | -89.350001    | -41.793248    |
|                              |                                | 3              | 7.6   | 8.7   | 0.56348 | 0.79705 | 175.946670 | 131.619374 | -16023.691580 | -9093.975953  |
| <b>23a</b>                   | AsH <sub>3</sub>               | 1              | 105.4 | 133.9 | 0.54625 | 0.97716 | 0.067020   | 0.029063   | -0.026528     | -0.004202     |
|                              |                                | 2              | 26.8  | 31.1  | 0.57358 | 0.78120 | 9.591482   | 6.644906   | -120.478320   | -58.080467    |
|                              |                                | 3              | 7.3   | 8.4   | 0.56281 | 0.79267 | 196.953579 | 148.697903 | -19334.337480 | -11187.429620 |
| <b>24a</b>                   | SeH <sub>2</sub>               | 1              | 97.3  | 117.8 | 0.57123 | 0.95581 | 0.097376   | 0.052955   | -0.052511     | -0.015292     |
|                              |                                | 2              | 25.7  | 29.7  | 0.57377 | 0.78162 | 11.151628  | 7.721873   | -154.786024   | -74.506297    |
|                              |                                | 3              | 7.0   | 8.0   | 0.56244 | 0.78978 | 219.588104 | 167.809988 | -23272.781810 | -13751.515260 |
| <b>25a</b>                   | BrH                            | 1              | 89.9  | 105.3 | 0.55028 | 0.91034 | 0.129446   | 0.079553   | -0.087975     | -0.033208     |
|                              |                                | 2              | 24.6  | 28.5  | 0.57368 | 0.78167 | 12.871053  | 8.911306   | -196.390024   | -94.459803    |
|                              |                                | 3              | 6.8   | 7.8   | 0.56094 | 0.78518 | 243.495600 | 187.168019 | -27586.206430 | -16514.267640 |
| <b>26b<sup>a</sup></b>       | KrCH <sub>3</sub> <sup>⊕</sup> | 1              | 82.4  | 99.6  | 0.52755 | 0.88133 | 0.182179   | 0.097759   | -0.161327     | -0.045283     |
|                              |                                | 2              | 23.6  | 27.2  | 0.57414 | 0.78245 | 14.887451  | 10.358985  | -251.703074   | -122.505984   |
|                              |                                | 3              | 6.6   | 7.5   | 0.56144 | 0.78297 | 270.056671 | 209.706874 | -32809.915000 | -20016.812560 |

<sup>a</sup> No (3,-3) ELF critical points were found for compounds **1a**, **2a** and **26a**.

<sup>b</sup>The values refer to the outer electron shell.

<sup>c</sup>The values refer to the first inner electron shell;

<sup>d</sup>The lower values refer to the second (closest to the atomic nucleus) inner electron shell.



**11. Cartesian coordinates (in Å) of studied compounds, optimized at the (u)B3LYP/AQZP//ATZP level in gas phase.**

Compound: **1a** H●

H 0.000000000 0.000000000 0.000000000

Compound: **2a** HeH<sup>⊕</sup>

He -0.697000000 -0.071967000 -0.003000000

H -0.697000000 0.715967000 -0.003000000

Compound: **3a** LiH●<sup>⊖</sup>

Li 0.183000000 -0.254858000 0.000000000

H 0.183000000 1.410858000 0.000000000

Compound: **3b** LiCH<sub>3</sub><sup>⊖</sup>

Li 0.891001000 -1.726416000 -0.000000000

C 0.890971000 0.274684000 0.000000000

H 1.906030000 0.692921000 0.000000000

H 0.383446000 0.692891000 -0.879073000

H 0.383446000 0.692891000 0.879073000

Compound: **4a** BeH●

Be 0.183000000 -0.091757000 0.000000000

H 0.183000000 1.247757000 0.000000000

Compound: **4b** BeH<sup>⊖</sup>

Be -0.691000000 0.366301000 0.000000000

H -0.691000000 -1.044301000 0.000000000

Compound: **5a** BH<sub>2</sub>●

B -0.690690000 0.122837000 -0.000000000

H 0.381705000 -0.380835000 -0.000000000

H -1.763014000 -0.381002000 -0.000000000

Compound: **5b** BH<sub>2</sub><sup>⊖</sup>

B -0.690706000 0.277527000 0.000000000

H 0.296721000 -0.458166000 0.000000000

H -1.678015000 -0.458361000 0.000000000

Compound: **5c** BH

B -0.730103000 0.189559000 0.000000000

H 0.336103000 -0.425559000 -0.000000000

Compound: **6a** CH<sub>3</sub>●

C -0.000134000 0.000090000 -0.121020000

H -1.002468000 -0.226847000 0.242197000

H 0.305208000 0.980973000 0.242105000

H 0.698067000 -0.754666000 0.241818000

Compound: **6b** CH<sub>3</sub><sup>⊖</sup>

C -0.690691000 0.077416000 -0.000000000

H 0.349148000 -0.275402000 0.000000000

H -1.210147000 -0.275520000 0.900544000

H -1.210147000 -0.275520000 -0.900544000

Compound: **6c** CH<sub>2</sub>

C -0.709271000 0.111078000 -0.032100000

H 0.321503000 -0.290986000 0.030191000

H -1.170231000 -0.291092000 0.891909000

Compound: **6d** CH<sub>2</sub>⊖

C -0.725597000 0.134108000 -0.060341000

H 0.347324000 -0.302489000 0.034091000

H -1.179727000 -0.302620000 0.916249000

Compound: **7a** NH<sub>3</sub>

N -0.731443000 -0.008448000 -0.070499000

H -0.713322000 1.002770000 -0.038709000

H 0.228058000 -0.328350000 -0.038497000

H -1.183293000 -0.327972000 0.776704000

Compound: **7b** NH<sub>3</sub>⊕

N 0.000023000 -0.000077000 -0.111561000

H 0.838199000 -0.427861000 0.260410000

H -0.790017000 -0.511471000 0.260349000

H -0.048345000 0.939869000 0.260165000

Compound: **7c** NH<sub>2</sub>⊖

N -0.750471000 -0.022075000 -0.049000000

H -0.689886000 1.002021000 -0.049000000

H 0.235358000 -0.305946000 -0.049000000

Compound: **7d** NH<sub>2</sub>⊕

N -0.741830000 -0.015958000 -0.049000000

H -0.721770000 1.037935000 -0.049000000

H 0.258600000 -0.347977000 -0.049000000

Compound: **8a** OH<sub>2</sub>

O -0.758998000 -0.086272000 -0.003000000

H -0.722748000 0.873285000 -0.003000000

H 0.157746000 -0.372013000 -0.003000000

Compound: **8b** OH⊕

O -0.743000000 -0.114272000 -0.003000000

H -0.743000000 0.924272000 -0.003000000

Compound: **8c** OH<sub>2</sub>⊕

O -0.755877000 -0.084063000 -0.003000000

H -0.895044000 1.113665000 -0.003000000

H 0.326921000 -0.614602000 -0.003000000

Compound: **9a** FH

F -0.697000000 -0.138994000 -0.003000000

H -0.697000000 0.782994000 -0.003000000

Compound: **9b** FH<sub>2</sub>⊕

|   |             |             |              |
|---|-------------|-------------|--------------|
| F | 0.000000000 | 0.000000000 | 0.140000000  |
| H | 0.000000000 | 0.000000000 | -1.260000000 |

Compound: **10a** NeH<sup>⊕</sup>

|    |              |              |              |
|----|--------------|--------------|--------------|
| Ne | -0.697000000 | -0.180888000 | -0.003000000 |
| H  | -0.697000000 | 0.824888000  | -0.003000000 |

Compound: **11a** NaH<sup>●⊖</sup>

|    |             |              |             |
|----|-------------|--------------|-------------|
| Na | 0.183000000 | -0.424966000 | 0.000000000 |
| H  | 0.183000000 | 1.580966000  | 0.000000000 |

Compound: **11b** NaCH<sub>3</sub><sup>②⊖</sup>

|    |             |              |              |
|----|-------------|--------------|--------------|
| Na | 0.891016000 | -1.989738000 | 0.000000000  |
| C  | 0.891619000 | 0.375814000  | 0.000000000  |
| H  | 1.921953000 | 0.746804000  | 0.000000000  |
| H  | 0.376664000 | 0.747427000  | -0.892163000 |
| H  | 0.376664000 | 0.747427000  | 0.892163000  |

Compound: **11c** NaH<sup>②⊖</sup>

|    |             |              |             |
|----|-------------|--------------|-------------|
| Na | 0.183000000 | -0.404551000 | 0.000000000 |
| H  | 0.183000000 | 1.560551000  | 0.000000000 |

Compound: **11d** NaCH<sub>3</sub><sup>●⊖</sup>

|    |             |              |              |
|----|-------------|--------------|--------------|
| Na | 0.890771000 | -2.037025000 | 0.000000000  |
| C  | 0.890822000 | 0.371088000  | 0.000000000  |
| H  | 1.916417000 | 0.764867000  | 0.000000000  |
| H  | 0.378043000 | 0.763909000  | -0.888432000 |
| H  | 0.378043000 | 0.763909000  | 0.888432000  |

Compound: **12a** MgH<sup>●</sup>

|    |             |              |             |
|----|-------------|--------------|-------------|
| Mg | 0.183000000 | -0.292190000 | 0.000000000 |
| H  | 0.183000000 | 1.448190000  | 0.000000000 |

Compound: **12b** MgH<sup>⊖</sup>

|    |              |              |             |
|----|--------------|--------------|-------------|
| Mg | -0.691000000 | 0.596610000  | 0.000000000 |
| H  | -0.691000000 | -1.274610000 | 0.000000000 |

Compound: **13a** AlH<sub>2</sub><sup>●</sup>

|    |              |              |             |
|----|--------------|--------------|-------------|
| Al | -0.690733000 | 0.335618000  | 0.000000000 |
| H  | 0.680382000  | -0.487198000 | 0.000000000 |
| H  | -2.061649000 | -0.487420000 | 0.000000000 |

Compound: **13b** AlH<sub>2</sub><sup>⊖</sup>

|    |              |              |             |
|----|--------------|--------------|-------------|
| Al | -0.690717000 | 0.546882000  | 0.000000000 |
| H  | 0.556208000  | -0.592817000 | 0.000000000 |
| H  | -1.937491000 | -0.593065000 | 0.000000000 |

Compound: **13c** AlH

|    |              |              |              |
|----|--------------|--------------|--------------|
| Al | -0.916731000 | 0.297230000  | 0.000000000  |
| H  | 0.522731000  | -0.533230000 | -0.000000000 |

Compound: **14a** SiH<sub>3</sub><sup>●</sup>

|    |              |             |              |
|----|--------------|-------------|--------------|
| Si | -0.126757000 | 0.029483000 | -0.054973000 |
|----|--------------|-------------|--------------|

|   |              |              |              |
|---|--------------|--------------|--------------|
| H | -0.148681000 | 1.512033000  | -0.092257000 |
| H | 1.263413000  | -0.486057000 | -0.092747000 |
| H | -0.854975000 | -0.485459000 | 1.129977000  |

Compound: **14b** SiH<sub>3</sub><sup>⊖</sup>

|    |              |              |              |
|----|--------------|--------------|--------------|
| Si | -0.697139000 | 0.415567000  | 0.000000000  |
| H  | 0.615198000  | -0.392711000 | -0.000000000 |
| H  | -1.359035000 | -0.382924000 | 1.140708000  |
| H  | -1.359035000 | -0.382924000 | -1.140708000 |

Compound: **14c** SiH<sub>2</sub>

|    |              |              |              |
|----|--------------|--------------|--------------|
| Si | -0.808681000 | 0.251362000  | -0.204133000 |
| H  | 0.571365000  | -0.361108000 | 0.000574000  |
| H  | -1.320684000 | -0.361254000 | 1.093559000  |

Compound: **15a** PH<sub>3</sub>

|   |              |              |              |
|---|--------------|--------------|--------------|
| P | -0.869638000 | -0.106259000 | -0.313705000 |
| H | -0.708927000 | 1.274539000  | -0.028969000 |
| H | 0.485786000  | -0.414729000 | -0.028727000 |
| H | -1.307221000 | -0.415551000 | 1.000401000  |

Compound: **15b** PH<sub>3</sub><sup>•</sup>

|   |              |              |              |
|---|--------------|--------------|--------------|
| P | -0.731907000 | -0.008819000 | -0.074418000 |
| H | -0.781151000 | 1.391594000  | -0.153608000 |
| H | 0.572090000  | -0.521864000 | -0.153352000 |
| H | -1.459031000 | -0.522912000 | 1.010376000  |

Compound: **15c** PH<sub>2</sub><sup>⊖</sup>

|   |              |              |              |
|---|--------------|--------------|--------------|
| P | -0.942117000 | -0.157662000 | -0.049000000 |
| H | -0.728738000 | 1.260192000  | -0.049000000 |
| H | 0.465855000  | -0.428530000 | -0.049000000 |

Compound: **15d** PH<sub>2</sub><sup>⊕</sup>

|   |              |              |              |
|---|--------------|--------------|--------------|
| P | -0.941852000 | -0.157484000 | -0.049000000 |
| H | -0.725335000 | 1.255103000  | -0.049000000 |
| H | 0.462188000  | -0.423618000 | -0.049000000 |

Compound: **16a** SH<sub>2</sub>

|   |              |              |              |
|---|--------------|--------------|--------------|
| S | -0.946363000 | -0.218756000 | -0.003000000 |
| H | -0.749801000 | 1.110286000  | -0.003000000 |
| H | 0.372164000  | -0.476530000 | -0.003000000 |

Compound: **16b** SH<sup>⊕</sup>

|   |              |              |              |
|---|--------------|--------------|--------------|
| S | -0.743000000 | -0.281010000 | -0.003000000 |
| H | -0.743000000 | 1.091010000  | -0.003000000 |

Compound: **16c** SH<sub>2</sub><sup>②</sup>⊕

|   |              |              |              |
|---|--------------|--------------|--------------|
| S | -0.970789000 | -0.236023000 | -0.003000000 |
| H | -0.785849000 | 1.187171000  | -0.003000000 |
| H | 0.432638000  | -0.536148000 | -0.003000000 |

Compound: **17a** ClH

|    |              |              |              |
|----|--------------|--------------|--------------|
| Cl | -0.697000000 | -0.319288000 | -0.003000000 |
|----|--------------|--------------|--------------|

H -0.697000000 0.963288000 -0.003000000

Compound: **17b** ClH<sub>2</sub><sup>⊕</sup>

Cl -0.697000000 -0.421425000 -0.003000000  
H -0.697000000 1.065425000 -0.003000000

Compound: **18a** ArH<sup>⊕</sup>

Ar -0.697000000 -0.324755000 -0.003000000  
H -0.697000000 0.968755000 -0.003000000

Compound: **19a** KCH<sub>3</sub><sup>⊖</sup>

K 0.892616000 -2.316315000 -0.000000000  
C 0.893768000 0.437370000 -0.000000000  
H 1.918029000 0.833266000 -0.000000000  
H 0.383205000 0.837416000 -0.886025000  
H 0.383205000 0.837416000 0.886025000

Compound: **19b** KH<sup>⊖</sup>

K 0.183000000 -0.618926000 0.000000000  
H 0.183000000 1.774926000 0.000000000

Compound: **19c** K-*i*-Pr<sup>⊖</sup>

K -0.386803000 -1.679364000 0.326543000  
C -0.295510000 1.127302000 0.168398000  
C 1.110017000 1.710276000 0.235690000  
C -1.056628000 1.710323000 -1.015097000  
H -0.826981000 1.410634000 1.089030000  
H 1.134772000 2.824630000 0.212454000  
H 1.643259000 1.408834000 1.143517000  
H 1.731144000 1.391362000 -0.611059000  
H -1.048780000 2.824677000 -1.048185000  
H -0.634012000 1.391347000 -1.976416000  
H -2.109479000 1.408979000 -1.022875000

Compound: **19d** KCH<sub>3</sub><sup>⊖</sup>

K 0.893214000 -2.349856000 0.000000000  
C 0.893273000 0.441854000 0.000000000  
H 1.916568000 0.842432000 0.000000000  
H 0.383768000 0.847367000 -0.884880000  
H 0.383768000 0.847367000 0.884880000

Compound: **20a** CaH<sup>⊖</sup>

Ca -0.691000000 0.772960000 0.000000000  
H -0.691000000 -1.450960000 0.000000000

Compound: **20b** CaH<sup>⊖</sup>

Ca 0.183000000 -0.460176000 0.000000000  
H 0.183000000 1.616176000 0.000000000

Compound: **20c** CaCH<sub>3</sub><sup>⊖</sup>

Ca 0.890492000 -2.062774000 0.000000000  
C 0.890983000 0.352446000 0.000000000  
H 1.907776000 0.780170000 0.000000000

|   |             |             |              |
|---|-------------|-------------|--------------|
| H | 0.382138000 | 0.778379000 | -0.881059000 |
| H | 0.382138000 | 0.778379000 | 0.881059000  |

Compound: **21a** GaH<sub>2</sub>•

|    |              |              |             |
|----|--------------|--------------|-------------|
| Ga | -0.690726000 | 0.316848000  | 0.000000000 |
| H  | 0.688647000  | -0.477827000 | 0.000000000 |
| H  | -2.069921000 | -0.478021000 | 0.000000000 |

Compound: **21b** GaH<sub>2</sub>⊖

|    |              |              |             |
|----|--------------|--------------|-------------|
| Ga | -0.690697000 | 0.563195000  | 0.000000000 |
| H  | 0.558387000  | -0.600996000 | 0.000000000 |
| H  | -1.939690000 | -0.601199000 | 0.000000000 |

Compound: **21c** GaH

|    |              |              |              |
|----|--------------|--------------|--------------|
| Ga | -0.924271000 | 0.301579000  | 0.000000000  |
| H  | 0.530271000  | -0.537579000 | -0.000000000 |

Compound: **22a** GeH<sub>3</sub>•

|    |              |              |              |
|----|--------------|--------------|--------------|
| Ge | -0.119492000 | 0.034614000  | -0.042229000 |
| H  | -0.154738000 | 1.531678000  | -0.103039000 |
| H  | 1.279934000  | -0.498317000 | -0.103551000 |
| H  | -0.872703000 | -0.497975000 | 1.138819000  |

Compound: **22b** GeH<sub>3</sub>⊖

|    |              |              |              |
|----|--------------|--------------|--------------|
| Ge | -0.698616000 | 0.414497000  | -0.000000000 |
| H  | 0.630856000  | -0.392771000 | 0.000000000  |
| H  | -1.369694000 | -0.381755000 | 1.155441000  |
| H  | -1.369694000 | -0.381755000 | -1.155441000 |

Compound: **22c** GeH<sub>2</sub>

|    |              |              |              |
|----|--------------|--------------|--------------|
| Ge | -0.807296000 | 0.249406000  | -0.201734000 |
| H  | 0.573936000  | -0.360135000 | -0.002503000 |
| H  | -1.324640000 | -0.360271000 | 1.094237000  |

Compound: **22d** GeH<sub>2</sub>②⊖

|    |              |              |              |
|----|--------------|--------------|--------------|
| Ge | -0.806594000 | 0.248423000  | -0.200534000 |
| H  | 0.595331000  | -0.359629000 | -0.015687000 |
| H  | -1.346737000 | -0.359795000 | 1.106220000  |

Compound: **23a** AsH<sub>3</sub>

|    |              |              |              |
|----|--------------|--------------|--------------|
| As | -0.897464000 | -0.125939000 | -0.363199000 |
| H  | -0.709175000 | 1.336645000  | -0.028960000 |
| H  | 0.544269000  | -0.435655000 | -0.028711000 |
| H  | -1.337630000 | -0.437051000 | 1.049870000  |

Compound: **23b** AsH<sub>3</sub>•

|    |              |              |              |
|----|--------------|--------------|--------------|
| As | -0.743377000 | -0.016934000 | -0.093533000 |
| H  | -0.787285000 | 1.461503000  | -0.167037000 |
| H  | 0.635962000  | -0.550942000 | -0.166766000 |
| H  | -1.505300000 | -0.555628000 | 1.056335000  |

Compound: **23c** AsH<sub>2</sub>⊖

|    |              |              |              |
|----|--------------|--------------|--------------|
| As | -0.983250000 | -0.186740000 | -0.049000000 |
|----|--------------|--------------|--------------|

|   |              |              |              |
|---|--------------|--------------|--------------|
| H | -0.737508000 | 1.316210000  | -0.049000000 |
| H | 0.515758000  | -0.455469000 | -0.049000000 |

Compound: **23d** AsH<sub>2</sub><sup>⊕</sup>

|    |              |              |              |
|----|--------------|--------------|--------------|
| As | -0.982406000 | -0.186148000 | -0.049000000 |
| H  | -0.732502000 | 1.308232000  | -0.049000000 |
| H  | 0.509907000  | -0.448084000 | -0.049000000 |

Compound: **24a** SeH<sub>2</sub>

|    |              |              |              |
|----|--------------|--------------|--------------|
| Se | -1.001140000 | -0.257482000 | -0.003000000 |
| H  | -0.757240000 | 1.178904000  | -0.003000000 |
| H  | 0.434379000  | -0.506422000 | -0.003000000 |

Compound: **24b** SeH<sup>⊖</sup>

|    |              |              |              |
|----|--------------|--------------|--------------|
| Se | -0.743000000 | -0.325004000 | -0.003000000 |
| H  | -0.743000000 | 1.135004000  | -0.003000000 |

Compound: **24c** SeH<sup>⊕</sup>

|    |              |              |              |
|----|--------------|--------------|--------------|
| Se | -0.743000000 | -0.333544000 | -0.003000000 |
| H  | -0.743000000 | 1.143544000  | -0.003000000 |

Compound: **24d** SeH<sub>2</sub><sup>②⊕</sup>

|    |              |              |              |
|----|--------------|--------------|--------------|
| Se | -1.025468000 | -0.274680000 | -0.003000000 |
| H  | -0.782757000 | 1.240796000  | -0.003000000 |
| H  | 0.484225000  | -0.551116000 | -0.003000000 |

Compound: **25a** BrH

|    |              |              |              |
|----|--------------|--------------|--------------|
| Br | -0.697000000 | -0.385078000 | -0.003000000 |
| H  | -0.697000000 | 1.029078000  | -0.003000000 |

Compound: **25b** BrH<sub>2</sub><sup>⊕</sup>

|    |              |              |              |
|----|--------------|--------------|--------------|
| Br | -0.697000000 | -0.450276000 | -0.003000000 |
| H  | -0.697000000 | 1.094276000  | -0.003000000 |

Compound: **26a** KrH<sup>⊕</sup>

|    |              |              |              |
|----|--------------|--------------|--------------|
| Kr | -0.697000000 | -0.394797000 | -0.003000000 |
| H  | -0.697000000 | 1.038797000  | -0.003000000 |

Compound: **26b** KrCH<sub>3</sub><sup>⊕</sup>

|    |             |              |              |
|----|-------------|--------------|--------------|
| Kr | 0.891042000 | -1.690437000 | 0.000000000  |
| C  | 0.891864000 | 0.441634000  | -0.000000000 |
| H  | 1.958219000 | 0.625253000  | 0.000000000  |
| H  | 0.359027000 | 0.625905000  | -0.923515000 |
| H  | 0.359027000 | 0.625905000  | 0.923515000  |
